# Supplementary material for: Organocatalytic enantioselective conjugate addition of ketones to isatylidine malononitriles
Source: Royal Society of Chemistry journal article supplement (doi:10.1039/c2cc17067a), 2011-12-07

## *Supporting Information*

### **Organocatalytic enantioselective conjugate addition of ketones to isatylidene malononitriles**

*Lu Liu,<sup>a</sup> Deyan Wu,<sup>a</sup> Xiangmin Li,<sup>a</sup> Sinan Wang,<sup>a</sup> Hao Li,<sup>a</sup> Jian Li,<sup>a,\*</sup> and Wei Wang<sup>a,b,\*</sup>*

<sup>a</sup> School of Pharmacy, East China University of Science and Technology, 130 Meilong Road, Shanghai 200237, China

<sup>b</sup> Department of Chemistry and Chemical Biology, University of New Mexico, MSC03 2060, Albuquerque, NM 87131-0001, USA.

**General.** Commercial reagents were used as received, unless otherwise stated. The  $^1\text{H}$ -NMR and  $^{13}\text{C}$ -NMR were recorded on a Bruke DRX 400 (400 MHz) instrument. Chemical shifts are reported in ppm from tetramethylsilane with the solvent resonance as the internal standard. The following abbreviations were used to explain the multiplicities: s = singlet, d = doublet, t = triplet, q = quartet, dd = doublet of doublets, m = multiplet, br = broad. Chromatography was carried out with silica gel (200-300 mesh) using mixtures of hexanes and ethyl acetate as eluents. The enantiomeric excess of products were detected on HPLC (Agilent 1200 series). Mass spectrometry was performed on a Micromass GCT CA055.

**Fig. S1.** Proposed models for chiral amine **I** and chiral phosphoric acid (*R*)-**5c** and (*S*)-**5c** co-catalyzed Michael addition of acetone to isatylidene malononitrile **1a**.

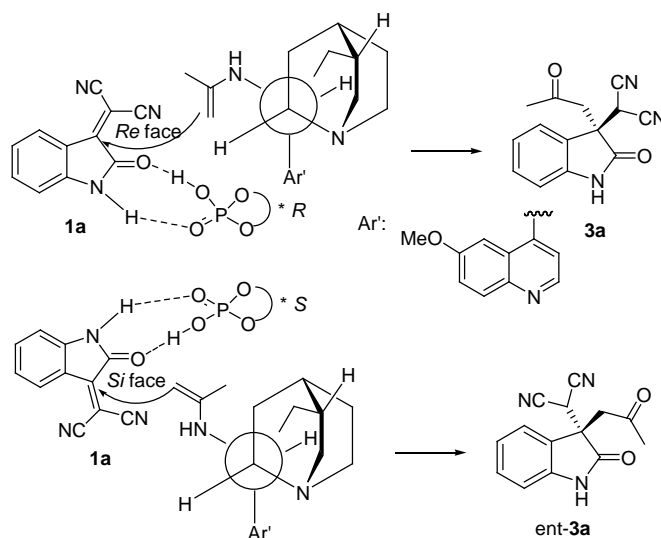

**Method A: Typical Procedure for Michael Reaction (Two-component Reaction, using **3a** as an example):** To a solution of isatylidene malononitrile (**1a**, 98 mg, 0.5 mmol), catalyst **I** (33 mg, 0.1 mmol) and (*R*)-**5c** (66 mg, 0.2 mmol) in 5 mL of THF was added acetone (0.4 mL, 5 mmol). After suitable time of stirring at rt, TLC analysis indicated completion of the reaction. The crude reaction mixture was directly subjected to column chromatography (hexane: ethylacetate = 2:1) on silica gel to afford the corresponding product.

**Method B: Typical Procedure for Knoevenagel-Michael Reaction (Three-component Reaction using **3a** as an example):** To a solution of isatin (**6a**, 73 mg, 0.5 mmol), malononitrile (33 mg, 0.5 mmol), catalyst **I** (33 mg, 0.1 mmol) and (*R*)-**5c** (66 mg, 0.2 mmol) in 5 mL of THF was added acetone (0.4 mL, 5 mmol). After suitable time of stirring at rt, TLC analysis indicated completion of the reaction. The crude reaction mixture was directly subjected to column chromatography (hexane: ethylacetate = 2:1) on silica gel to afford the corresponding product.

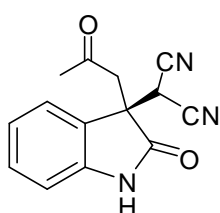

**2-(2-Oxo-3-(2-oxopropyl)indolin-3-yl)malononitrile (3a).** The title compound was prepared according to the method B, as described above in 92% yield.  $^1\text{H}$  NMR (400 MHz,  $\text{MeOH-}d_4$ ):  $\delta$  = 6.6 (2H, d,  $J$  = 33.2 Hz, ArH), 6.2 (2H, d,  $J$  = 33.2 Hz, ArH), 4.0 (1H, s, CH), 2.76 (1H,  $J$  = 17.6 Hz, CH), 2.53 (1H, d,  $J$  = 17.6 Hz, CH), 1.2 (3H, s,  $\text{CH}_3$ );  $^{13}\text{C}$  NMR (75 MHz,  $\text{MeOH-}d_4$ ):  $\delta$  = 202.9, 175.5, 142.0, 129.1, 125.6, 122.3, 121.6, 110.0, 109.5, 48.2, 44.8, 27.8; HRMS:  $\text{C}_{14}\text{H}_{11}\text{N}_3\text{O}_2$   $[\text{M}]^+$  calcd: 253.0851, found: 253.0858; HPLC (Chiralpak AD-H, *i*-propanol/hexane = 30/70, flow rate 1.0 mL/min,  $\lambda$  = 254 nm, 30 °C):  $t_{\text{minor}}$  = 12.1 min,  $t_{\text{major}}$  = 9.9 min, ee = 95%,  $[\alpha]_{\text{D}}^{20}$  = -41.07° (MeOH,  $c$  = 0.3); mp: 199-200 °C.

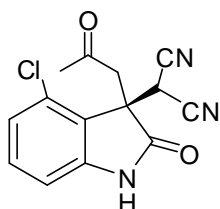

**2-(4-Chloro-2-oxo-3-(2-oxopropyl)indolin-3-yl)malononitrile (3b).** The title compound was prepared according to the method B, as described above in 92% yield.  $^1\text{H}$  NMR (400 MHz,  $\text{MeOH-}d_4$ ):  $\delta$  = 7.3 (1H, t,  $J$  = 8.0 Hz, ArH), 7.0 (1H, d,  $J$  = 8.0 Hz, ArH), 6.9 (1H, d,  $J$  = 8.0 Hz, ArH), 3.96 (1H, d,  $J$  = 18.0 Hz, CH), 3.46 (1H, d,  $J$  = 18.0 Hz, CH), 2.1 (3H, s,  $\text{CH}_3$ );  $^{13}\text{C}$  NMR (75 MHz,  $\text{MeOH-}d_4$ ):  $\delta$  = 203.3, 175.1, 145.4, 131.6, 129.8, 122.9, 122.7, 109.8, 109.1, 49.9, 44.3, 28.2, 23.0; HRMS:  $\text{C}_{14}\text{H}_{10}\text{N}_3\text{O}_2\text{Cl}$   $[\text{M}]^+$  calcd: 287.0462, found: 287.0464; HPLC (Chiralpak AS-H, *i*-propanol/hexane = 20/80, flow rate 1.0 mL/min,  $\lambda$  = 254 nm, 30 °C):  $t_{\text{minor}}$  = 25.5 min,  $t_{\text{major}}$  = 28.9 min, ee = 97%,  $[\alpha]_{\text{D}}^{20}$  = -19.4° (MeOH,  $c$  = 0.2); mp: 205-206 °C.

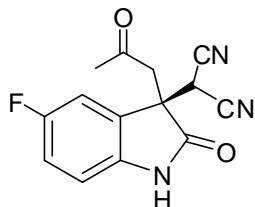

**2-(5-Fluoro-2-oxo-3-(2-oxopropyl)indolin-3-yl)malononitrile (3c).** The title compound was prepared according to the method 2, as described above in 94% yield.  $^1\text{H}$  NMR (400 MHz,  $\text{MeOH-}d_4$ ):  $\delta$  = 7.2 (1H, m, ArH), 7.1 (1H, m, ArH), 7.0 (1H, m, ArH), 3.62 (1H, d,  $J$  = 18.0 Hz, CH), 3.39 (1H, d,  $J$  = 18.0 Hz, CH), 2.1 (3H, s,  $\text{CH}_3$ );  $^{13}\text{C}$  NMR (75 MHz,  $\text{MeOH-}d_4$ ):  $\delta$  = 203.7, 176.2, 159.0 ( $^2J_{\text{C-F}}$  = 179.0 Hz), 139.0, 128.1, 116.1, 111.2 ( $^3J_{\text{C-F}}$  = 13.0 Hz), 110.5 ( $^3J_{\text{C-F}}$  = 17.5 Hz), 49.4, 45.6, 28.4; HRMS:  $\text{C}_{14}\text{H}_{10}\text{N}_3\text{O}_2\text{F}$   $[\text{M}]^+$  calcd: 271.0757, found: 271.0760; HPLC (Chiralpak AS-H, *i*-propanol/hexane = 20/80, flow rate 1.0 mL/min,  $\lambda$  = 254 nm, 30 °C):  $t_{\text{minor}}$  = 18.0 min,  $t_{\text{major}}$  = 33.3 min, ee = 96%,  $[\alpha]_{\text{D}}^{20}$  = -80° (MeOH,  $c$  = 0.15); mp: 204-205 °C.

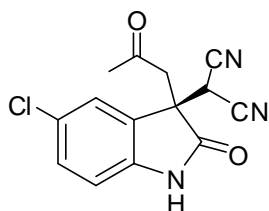

**2-(5-Chloro-2-oxo-3-(2-oxopropyl)indolin-3-yl)malononitrile (3d).** The title compound was prepared according to the method B, as described above in 92% yield.  $^1\text{H}$  NMR (400 MHz,  $\text{MeOH}-d_4$ ):  $\delta$  = 7.4 (1H, d,  $J$  = 2.0 Hz, ArH), 7.3 (1H, m, ArH), 7.0 (1H, d,  $J$  = 8.0 Hz, ArH), 3.65 (1H, d,  $J$  = 18.0 Hz, CH), 3.39 (1H, d,  $J$  = 18.0 Hz, CH), 2.1 (3H, s,  $\text{CH}_3$ );  $^{13}\text{C}$  NMR (75 MHz,  $\text{MeOH}-d_4$ ):  $\delta$  = 203.7, 175.9, 141.7, 129.9, 128.4, 127.5, 123.6, 111.4, 110.6, 110.0, 49.1, 45.7, 28.3, 23.0; HRMS:  $\text{C}_{14}\text{H}_{10}\text{N}_3\text{O}_2\text{Cl}$   $[\text{M}]^+$  calcd: 287.0462, found: 287.0463; HPLC (Chiralpak AS-H, *i*-propanol/hexane = 20/80, flow rate 1.0 mL/min,  $\lambda$  = 254 nm, 30°C):  $t_{\text{minor}}$  = 17.3 min,  $t_{\text{major}}$  = 31.3 min, ee = 95%,  $[\alpha]_{\text{D}}^{20}$  = -130° (MeOH,  $c$  = 0.15); mp: 209-210 °C.

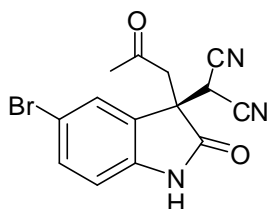

**2-(5-Bromo-2-oxo-3-(2-oxopropyl)indolin-3-yl)malononitrile (3e).** The title compound was prepared according to the method B, as described above in 93% yield.  $^1\text{H}$  NMR (400 MHz,  $\text{MeOH}-d_4$ ):  $\delta$  = 7.6 (1H, d,  $J$  = 2.0 Hz, ArH), 7.5 (H, m, ArH), 6.9 (1H, d,  $J$  = 8.4 Hz, ArH), 3.63 (1H, d,  $J$  = 18.4 Hz, CH), 3.38 (1H, d,  $J$  = 18.4 Hz, CH), 2.1 (3H, s,  $\text{CH}_3$ );  $^{13}\text{C}$  NMR (75 MHz,  $\text{MeOH}-d_4$ ):  $\delta$  = 203.6, 175.8, 142.2, 132.8, 128.8, 126.4, 114.5, 111.9, 110.6, 49.0, 45.7, 28.3; HRMS:  $\text{C}_{14}\text{H}_{10}\text{N}_3\text{O}_2\text{Br}$   $[\text{M}]^+$  calcd: 330.9956, found: 330.9955; HPLC (Chiralpak AS-H, *i*-propanol/hexane = 30/70, flow rate 1.0 mL/min,  $\lambda$  = 254 nm, 30°C):  $t_{\text{minor}}$  = 10.9 min,  $t_{\text{major}}$  = 19.2 min, ee = 94%,  $[\alpha]_{\text{D}}^{20}$  = -55.3° (MeOH,  $c$  = 0.17); mp: 224-226 °C.

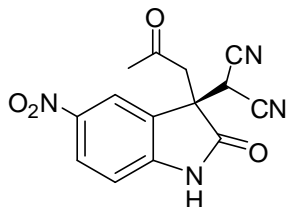

**2-(5-Nitro-2-oxo-3-(2-oxopropyl)indolin-3-yl)malononitrile (3f).** The title compound was prepared according to the method B, as described above in 94% yield.  $^1\text{H}$  NMR (400 MHz,  $\text{MeOH}-d_4$ ):  $\delta$  = 8.3 (2H, m, ArH), 7.1 (1H, d,  $J$  = 8.4 Hz, ArH), 3.77 (1H, d,  $J$  = 18.4 Hz, CH), 3.50 (1H, d,  $J$  = 18.4 Hz, CH), 2.1 (3H, s,  $\text{CH}_3$ );  $^{13}\text{C}$  NMR (75 MHz,  $\text{MeOH}-d_4$ ):  $\delta$  = 204.3, 176.3, 150.0, 142.7, 128.0, 127.6, 120.2, 111.5, 111.2, 110.7, 48.6, 46.3, 30.0, 29.9; HRMS:  $\text{C}_{14}\text{H}_{10}\text{N}_4\text{O}_4$   $[\text{M}]^+$  calcd: 298.0702, found: 298.0704; HPLC (Chiralpak AS-H, *i*-propanol/hexane = 30/70, flow rate 1.0 mL/min,  $\lambda$  = 230 nm, 30°C):  $t_{\text{minor}}$  = 17.7 min,  $t_{\text{major}}$  = 23.9 min, ee = 93%,  $[\alpha]_{\text{D}}^{20}$  = -21.88° (MeOH,  $c$  = 0.16); mp: 233-234 °C.

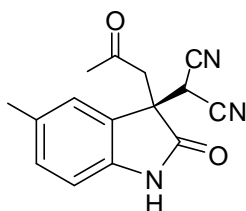

**2-(5-Methyl-2-oxo-3-(2-oxopropyl)indolin-3-yl)malononitrile (3g).** The title compound was prepared according to the method B, as described above in 95% yield.  $^1\text{H}$  NMR (400 MHz,  $\text{MeOH-}d_4$ ):  $\delta$  = 7.2 (1H, s, ArH), 7.1 (1H, d,  $J$  = 8.0 Hz, ArH), 6.9 (1H, d,  $J$  = 8.0 Hz, ArH), 3.55 (1H, d,  $J$  = 18.0 Hz, CH), 3.32 (1H, d,  $J$  = 18.0 Hz, CH), 2.3 (3H, s,  $\text{CH}_3$ ), 2.0 (3H, s,  $\text{CH}_3$ );  $^{13}\text{C}$  NMR (75 MHz,  $\text{MeOH-}d_4$ ):  $\delta$  = 203.7, 176.4, 140.3, 132.2, 130.2, 126.5, 123.7, 110.9, 110.1, 49.1, 45.6, 28.6, 19.7, 13.0; HRMS:  $\text{C}_{15}\text{H}_{13}\text{N}_3\text{O}_2$   $[\text{M}]^+$  calcd: 267.1008, found: 267.1010; HPLC (Chiralpak AD-H, *i*-propanol/hexane = 20/80, flow rate 1.0 mL/min,  $\lambda$  = 254 nm, 30 °C):  $t_{\text{minor}}$  = 19.2 min,  $t_{\text{major}}$  = 14.6 min, ee = 95%,  $[\alpha]_{\text{D}}^{20}$  = -161.8° (MeOH,  $c$  = 0.11); mp: 206-207 °C.

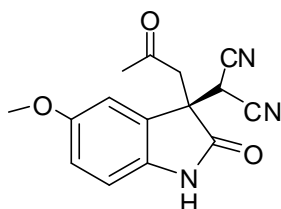

**2-(5-Methoxy-2-oxo-3-(2-oxopropyl)indolin-3-yl)malononitrile (3h).** The title compound was prepared according to the method B, as described above in 96% yield.  $^1\text{H}$  NMR (400 MHz,  $\text{MeOH-}d_4$ ):  $\delta$  = 6.9-7.0 (3H, m, ArH), 3.7 (3H, s,  $\text{CH}_3$ ), 3.57 (1H, d,  $J$  = 18.0 Hz, CH), 3.33 (1H, d,  $J$  = 18.0 Hz, CH), 2.1 (3H, s,  $\text{CH}_3$ );  $^{13}\text{C}$  NMR (75 MHz,  $\text{MeOH-}d_4$ ):  $\delta$  = 203.7, 176.2, 156.1, 135.9, 127.6, 114.5, 110.8, 110.3, 54.8, 49.4, 45.6, 28.6; HRMS:  $\text{C}_{15}\text{H}_{13}\text{N}_3\text{O}_3$   $[\text{M}]^+$  calcd: 283.0957, found: 283.0958; HPLC (Chiralpak AD-H, *i*-propanol/hexane = 20/80, flow rate 1.0 mL/min,  $\lambda$  = 254 nm, 30 °C):  $t_{\text{minor}}$  = 24.2 min,  $t_{\text{major}}$  = 19.3 min, ee = 95%,  $[\alpha]_{\text{D}}^{20}$  = -307.1° (MeOH,  $c$  = 0.14); mp: 202-203 °C.

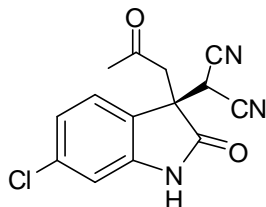

**2-(6-Chloro-2-oxo-3-(2-oxopropyl)indolin-3-yl)malononitrile (3i).** The title compound as yellow oil was prepared according to the method B, as described above in 93% yield.  $^1\text{H}$  NMR (400 MHz,  $\text{MeOH-}d_4$ ):  $\delta$  = 7.1-7.3 (3H, m, ArH), 3.58 (1H, d,  $J$  = 18.0 Hz, CH), 3.36 (1H, d,  $J$  = 18.0 Hz, CH), 2.1 (3H, s,  $\text{CH}_3$ );  $^{13}\text{C}$  NMR (75 MHz,  $\text{MeOH-}d_4$ ):  $\delta$  = 203.6, 176.1, 144.4, 125.6, 125.1, 124.7, 123.4, 113.5, 110.6, 110.1, 48.7, 45.6, 28.4; HRMS:  $\text{C}_{14}\text{H}_{10}\text{N}_3\text{O}_2\text{Cl}$   $[\text{M}]^+$  calcd: 287.0462, found: 287.0464; HPLC (Chiralpak AS-H, *i*-propanol/hexane = 20/80, flow rate 1.0 mL/min,  $\lambda$  = 254 nm, 30 °C):  $t_{\text{minor}}$  = 19.2 min,  $t_{\text{major}}$  = 26.3 min, ee = 96%,  $[\alpha]_{\text{D}}^{20}$  = -21.8° (MeOH,  $c$  = 0.16); mp: 219-220 °C.

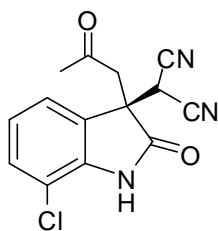

**2-(7-Chloro-2-oxo-3-(2-oxopropyl)indolin-3-yl)malononitrile (3j).** The title compound was prepared according to the method B, as described above in 91% yield.  $^1\text{H}$  NMR (400 MHz,  $\text{MeOH-}d_4$ ):  $\delta$  = 7.3 (2H, d,  $J$  = 8.0 Hz, ArH) 7.1 (H, m, ArH), 3.62 (1H, d,  $J$  = 18.0 Hz, CH), 3.41 (1H, d,  $J$  = 18.0 Hz, CH), 2.3 (1H, s, CH), 2.1 (3H, s,  $\text{CH}_3$ );  $^{13}\text{C}$  NMR (75 MHz,  $\text{MeOH-}d_4$ ):  $\delta$  = 203.6, 175.8, 140.8, 130.0, 128.2, 123.3, 121.6, 115.5, 110.6, 110.1, 49.6, 45.8, 28.4, 23.0; HRMS:  $\text{C}_{14}\text{H}_{10}\text{N}_3\text{O}_2\text{Cl}$   $[\text{M}]^+$  calcd: 287.0462, found: 287.0461; HPLC (Chiralpak AD-H, *i*-propanol/hexane = 20/80, flow rate 1.0 mL/min,  $\lambda$  = 254 nm, 30 °C):  $t_{\text{minor}}$  = 25.4 min,  $t_{\text{major}}$  = 14.2 min, ee = 86%,  $[\alpha]_{\text{D}}^{20}$  = -32.8° (MeOH,  $c$  = 0.35); mp: 197-199 °C.

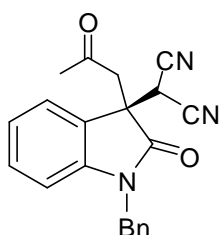

**2-(1-Benzyl-2-oxo-3-(2-oxopropyl)indolin-3-yl)malononitrile (3k).** The title compound was prepared according to the method A, as described above in 92% yield.  $^1\text{H}$  NMR (400 MHz,  $\text{MeOH-}d_4$ ):  $\delta$  = 6.0-6.6 (9H, m, ArH), 4.2 (2H, s,  $\text{CH}_2$ ), 2.86 (1H, d,  $J$  = 18.0 Hz, CH), 2.63 (1H, d,  $J$  = 18.0 Hz, CH), 1.2 (3H, s,  $\text{CH}_3$ );  $^{13}\text{C}$  NMR (75 MHz,  $\text{MeOH-}d_4$ ):  $\delta$  = 202.8, 173.9, 143.0, 134.4, 129.1, 127.5, 126.5, 126.3, 124.9, 122.2, 122.1, 110.1, 109.6, 109.3, 47.8, 45.1, 43.2, 27.7, 22.3; HRMS:  $\text{C}_{21}\text{H}_{17}\text{N}_3\text{O}_2$   $[\text{M}]^+$  calcd: 343.1321, found: 343.1320; HPLC (Chiralpak AD-H, *i*-propanol/hexane = 20/80, flow rate 1.0 mL/min,  $\lambda$  = 254 nm, 30 °C):  $t_{\text{minor}}$  = 23.5 min,  $t_{\text{major}}$  = 12.1 min, ee = 46%,  $[\alpha]_{\text{D}}^{20}$  = -12.5° (MeOH,  $c$  = 0.2).

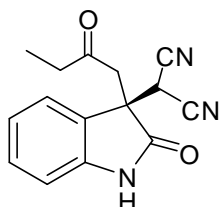

**2-(2-Oxo-3-(2-oxobutyl)indolin-3-yl)malononitrile (3l).** The title compound was prepared according to the method A, as described above in 97% yield.  $^1\text{H}$  NMR (400 MHz,  $\text{MeOH-}d_4$ ):  $\delta$  = 7.0-7.4 (4H, m, ArH), 3.54 (1H, d,  $J$  = 17.6 Hz, CH), 3.30 (1H, d,  $J$  = 17.6 Hz, CH), 3.3-3.5 (2H, dd,  $J_1$  = 17.6 Hz,  $J_2$  = 94.0 Hz,  $\text{CH}_2$ ), 2.4 (2H, m,  $\text{CH}_2$ ), 0.9 (3H, t,  $J$  = 6.8 Hz,  $\text{CH}_3$ );  $^{13}\text{C}$  NMR (75 MHz,  $\text{MeOH-}d_4$ ):  $\delta$  = 206.4, 176.4, 142.8, 129.9, 126.5, 123.1, 122.4, 110.9, 110.3, 49.1, 44.6, 35.3, 6.2; HRMS:  $\text{C}_{15}\text{H}_{13}\text{N}_3\text{O}_2$   $[\text{M}]^+$  calcd: 267.1008, found: 267.1017; HPLC (Chiralpak AD-H, *i*-propanol/hexane = 30/70, flow rate 1.0 mL/min,  $\lambda$  = 254 nm, 30 °C):  $t_{\text{minor}}$  = 12.3 min,  $t_{\text{major}}$  = 10.1 min, ee = 92%,  $[\alpha]_{\text{D}}^{20}$  = -80° (MeOH,  $c$  = 0.1); mp: 168-169 °C.

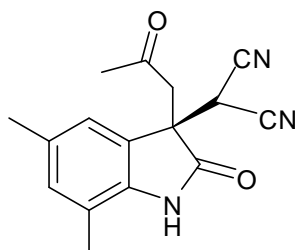

**2-(5,7-Dimethyl-2-oxo-3-(2-oxopropyl)indolin-3-yl)malononitrile (3m).** The title compound was prepared according to the method B, as described above in 85% yield.  $^1\text{H}$  NMR (400 MHz,  $\text{MeOH-}d_4$ ):  $\delta$  = 7.08 (1H, s, ArH), 7.0 (1H, s, ArH), 3.53 (1H, d,  $J$  = 18.0 Hz, CH), 3.30 (1H, d,  $J$  = 18.0 Hz, CH), 2.3 (3H, s,  $\text{CH}_3$ ), 2.27 (3H, s,  $\text{CH}_3$ ), 2.0 (3H, s,  $\text{CH}_3$ );  $^{13}\text{C}$  NMR (75 MHz,  $\text{MeOH-}d_4$ ):  $\delta$  = 203.7, 176.6, 138.8, 132.2, 131.7, 126.2, 120.9, 119.9, 110.9, 49.2, 45.6, 29.3, 28.6, 19.6, 15.2; HRMS:  $\text{C}_{16}\text{H}_{15}\text{N}_3\text{O}_2$   $[\text{M}]^+$  calcd: 281.1164, found: 281.1172; HPLC (Chiralpak AD-H, *i*-propanol/hexane = 30/70, flow rate 1.0 mL/min,  $\lambda$  = 254 nm, 25 °C):  $t_{\text{minor}}$  = 9.3 min,  $t_{\text{major}}$  = 7.1 min, ee = 93%,  $[\alpha]_{\text{D}}^{16.3}$  = -11.28° (MeOH,  $c$  = 0.25); mp: 166-167 °C.

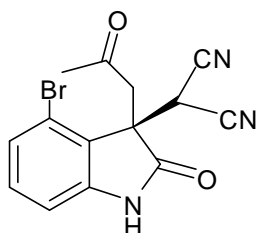

**2-(4-Bromo-2-oxo-3-(2-oxopropyl)indolin-3-yl)malononitrile (3n).** The title compound was prepared according to the method B, as described above in 90% yield.  $^1\text{H}$  NMR (400 MHz,  $\text{MeOH-}d_4$ ):  $\delta$  = 7.3 (1H, m, ArH), 7.2 (1H, d,  $J$  = 8.4 Hz, ArH), 7.0 (1H, d,  $J$  = 8.0 Hz, ArH), 4.0 (1H, d,  $J$  = 18.0 Hz,  $\text{CH}_2$ ), 3.4 (1H, d,  $J$  = 18.0 Hz,  $\text{CH}_2$ ), 2.1 (3H, s,  $\text{CH}_3$ );  $^{13}\text{C}$  NMR (75 MHz,  $\text{MeOH-}d_4$ ):  $\delta$  = 203.2, 175.1, 144.4, 131.9, 128.1, 120.1, 109.7, 105.1, 53.4, 44.3, 28.2, 19.4; HRMS:  $\text{C}_{14}\text{H}_{10}\text{N}_3\text{O}_2\text{Br}$   $[\text{M}]^+$  calcd: 330.9956, found: 330.9955; HPLC (Chiralpak AD-H, *i*-propanol/hexane = 30/70, flow rate 1.0 mL/min,  $\lambda$  = 254 nm, 25 °C):  $t_{\text{minor}}$  = 9.7 min,  $t_{\text{major}}$  = 8.6 min, ee > 99%,  $[\alpha]_{\text{D}}^{16.5}$  = -19.1° (MeOH,  $c$  = 0.3); mp: 197-199 °C.

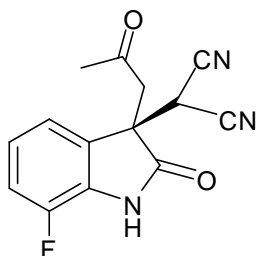

**2-(7-Fluoro-2-oxo-3-(2-oxopropyl)indolin-3-yl)malononitrile (3o).** The title compound was prepared according to the method B, as described above in 97% yield.  $^1\text{H}$  NMR (400 MHz,  $\text{MeOH-}d_4$ ):  $\delta$  = 7.07-7.28 (3H, m, ArH), 3.63 (1H, d,  $J$  = 18.0 Hz, CH), 3.40 (1H, d,  $J$  = 18.0 Hz, CH), 2.1 (3H, s,  $\text{CH}_3$ );  $^{13}\text{C}$  NMR (75 MHz,  $\text{MeOH-}d_4$ ):  $\delta$  = 203.5, 175.8, 148.5, 146.1, 130.3, 129.4, 123.2, 119.0, 117.0, 110.6, 110.1, 49.2, 45.8, 28.4; HRMS:  $\text{C}_{14}\text{H}_{10}\text{N}_3\text{O}_2\text{F}$   $[\text{M}]^+$  calcd: 271.0757, found: 271.0760; HPLC (Chiralpak AD-H, *i*-propanol/hexane = 30/70, flow rate 1.0 mL/min,  $\lambda$  = 254 nm, 25 °C):  $t_{\text{minor}}$  = 18.1 min,  $t_{\text{major}}$  = 10.5 min, ee = 88%,  $[\alpha]_{\text{D}}^{16.9}$  = -2.85° (MeOH,  $c$  = 0.4); mp: 217-219 °C.

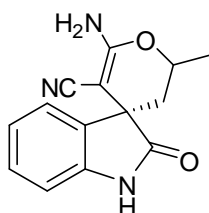

**6'-Amino-2'-methyl-2-oxo-2',3'-dihydrospiro[indoline-3,4'-pyran]-5'-carbonitrile (7).** NaBH<sub>4</sub> (4.0 mg, 0.1 mmol) was added to a solution of **3a** (13.0 mg, 0.05 mmol, 92% ee) in MeOH (0.35 mL) at rt with stirring. The reaction was stirred for 30 min then the solvent was removed. The crude reaction mixture was directly subjected to column chromatography (hexane: ethylacetate = 1:1) on silica gel to afford the corresponding product in 80% yield. <sup>1</sup>H NMR (400 MHz, acetone-*d*<sub>6</sub>): δ = 6.9-7.4 (4H, m, *ArH*), 1.7-1.9 (2H, dd, *J*<sub>1</sub> = 13.6 Hz, *J*<sub>2</sub> = 57.6 Hz, *CH*<sub>2</sub>), 1.4 (3H, d, *J* = 6.0 Hz, *CH*<sub>3</sub>); <sup>13</sup>C NMR (75 MHz, acetone-*d*<sub>6</sub>): δ = 179.0, 165.6, 141.1, 134.9, 128.3, 124.1, 121.9, 109.6, 70.9, 59.6, 47.8, 39.1, 20.0; HRMS: C<sub>14</sub>H<sub>13</sub>N<sub>3</sub>O<sub>2</sub> [M]<sup>+</sup> calcd: 255.1008, found: 255.1012; HPLC (Chiralpak AD-H, *i*-propanol/hexane = 20/80, flow rate 1.0 mL/min, λ = 254 nm, 30 °C): t<sub>jj</sub> = 13.2 min, t<sub>mj</sub> = 14.9 min, ee = 91%, dr = 9:1, [α]<sub>D</sub><sup>20</sup> = -9.4° (MeOH, *c* = 0.17); mp: 284-285 °C.



3a

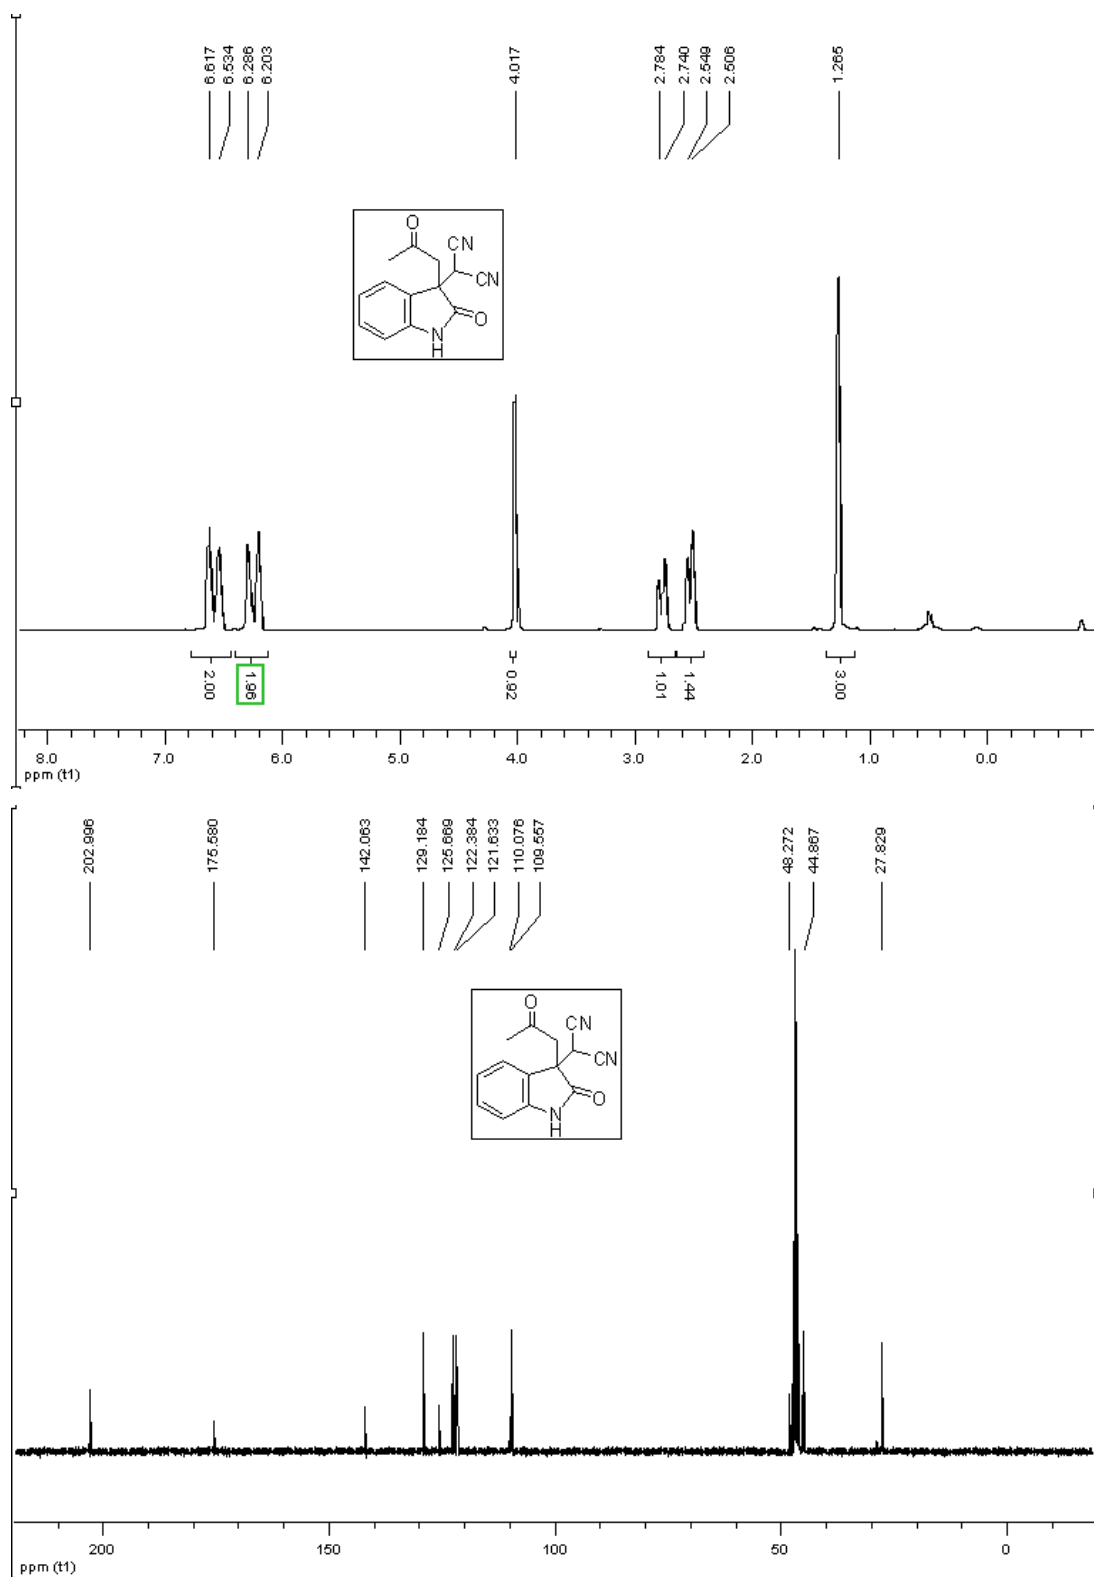

3b

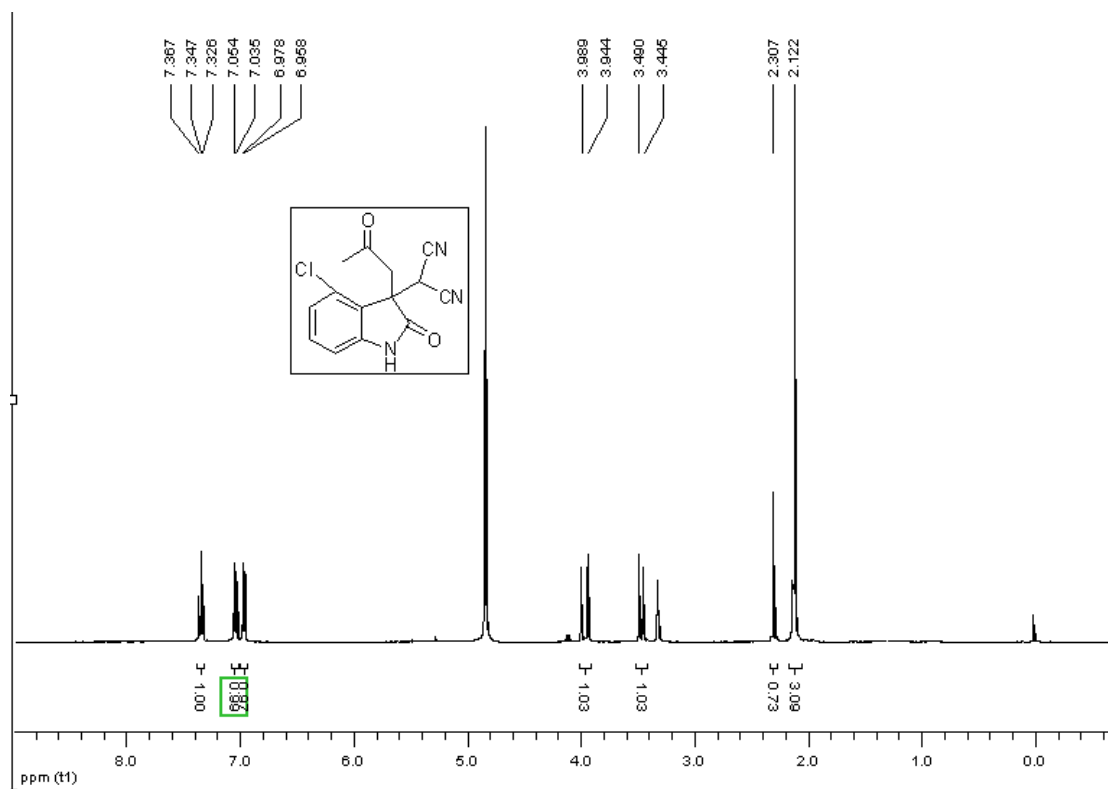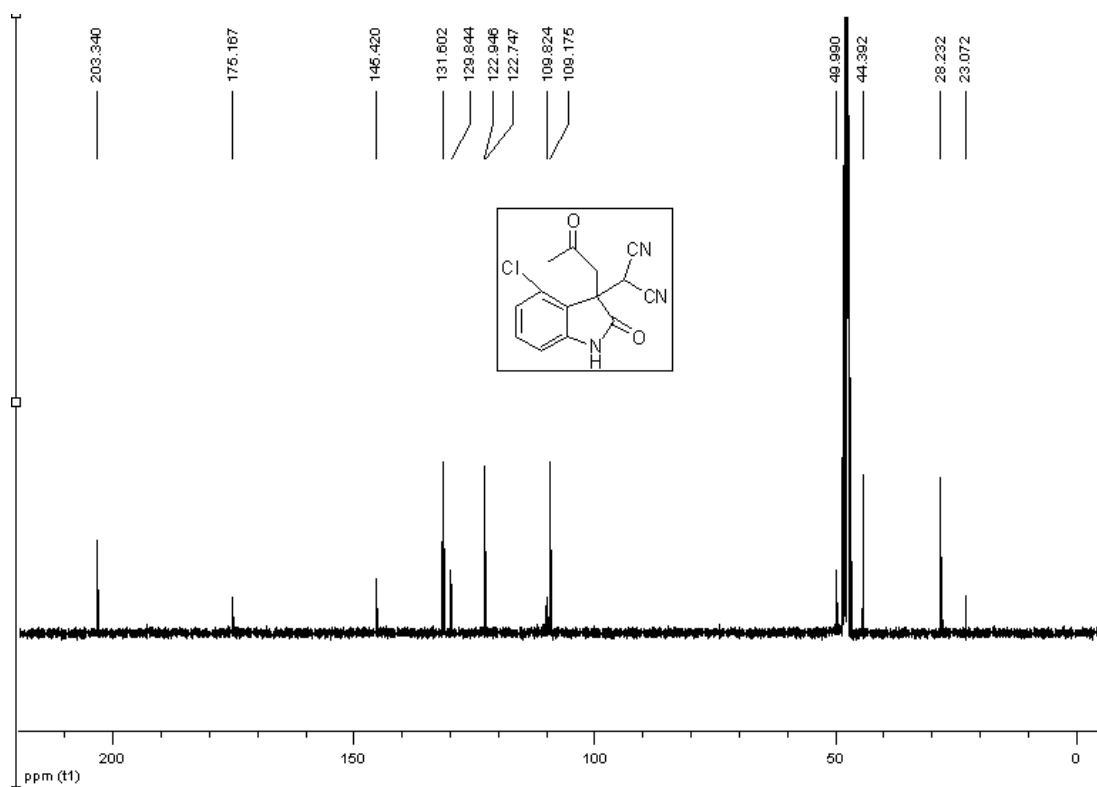

3c

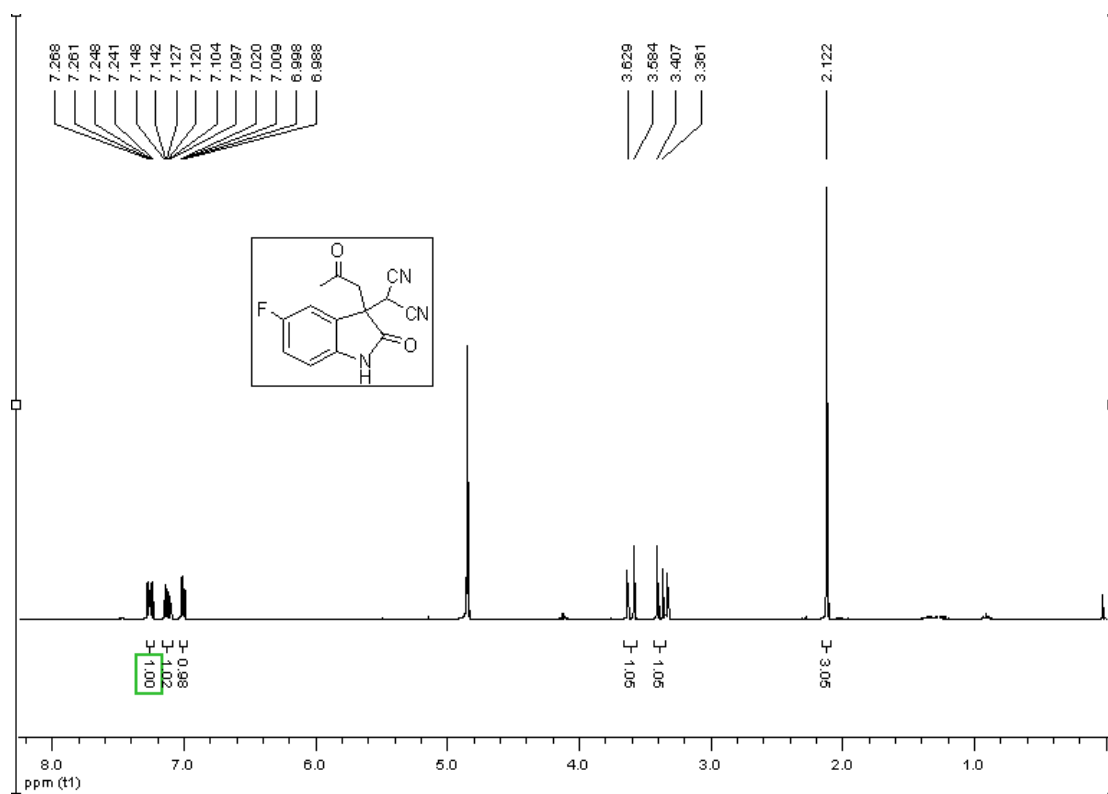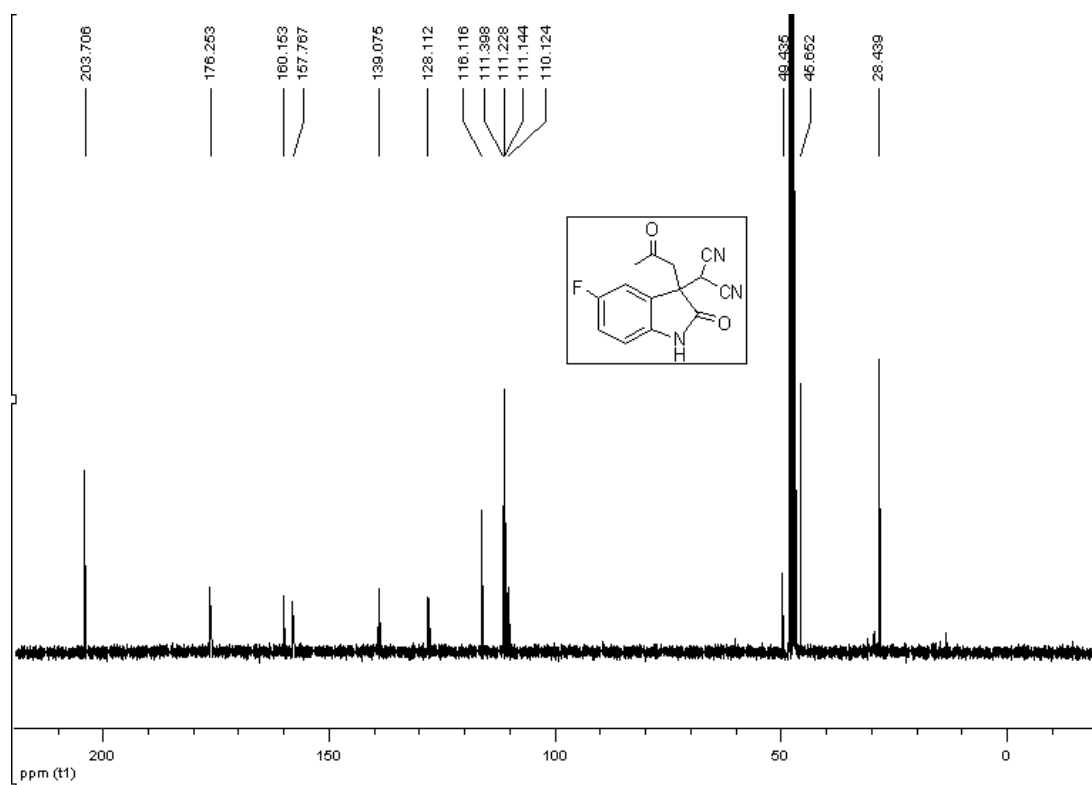

**3d**

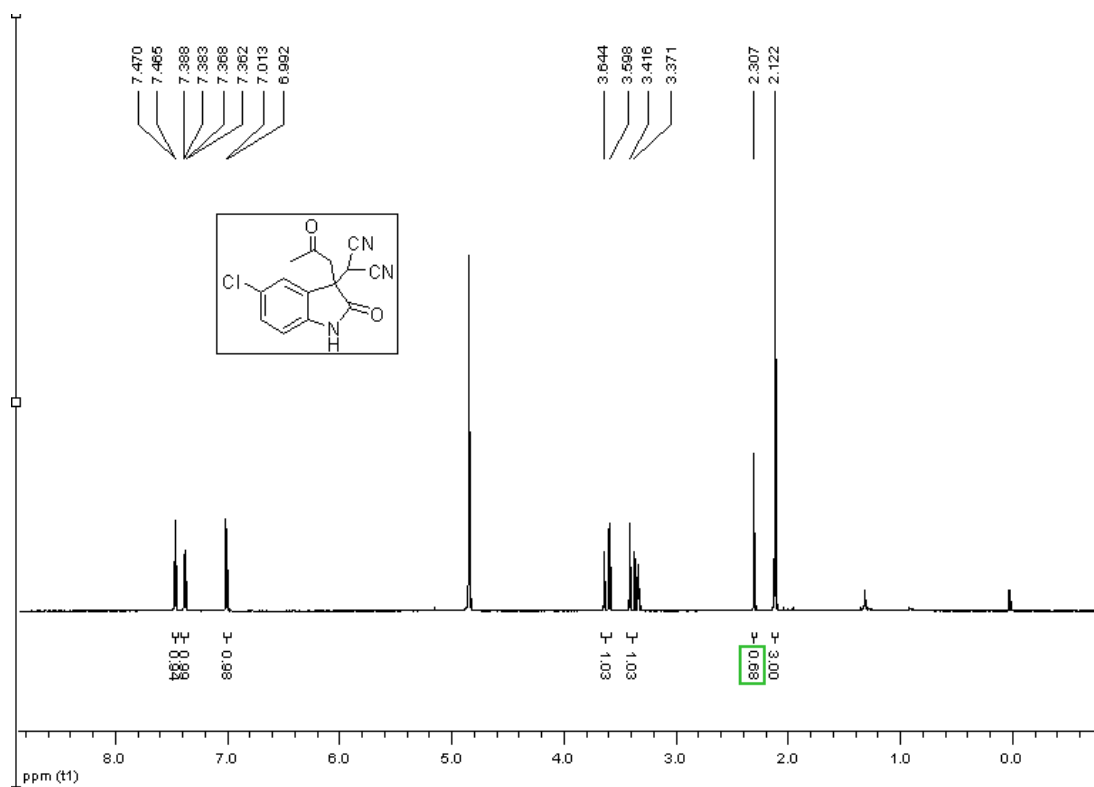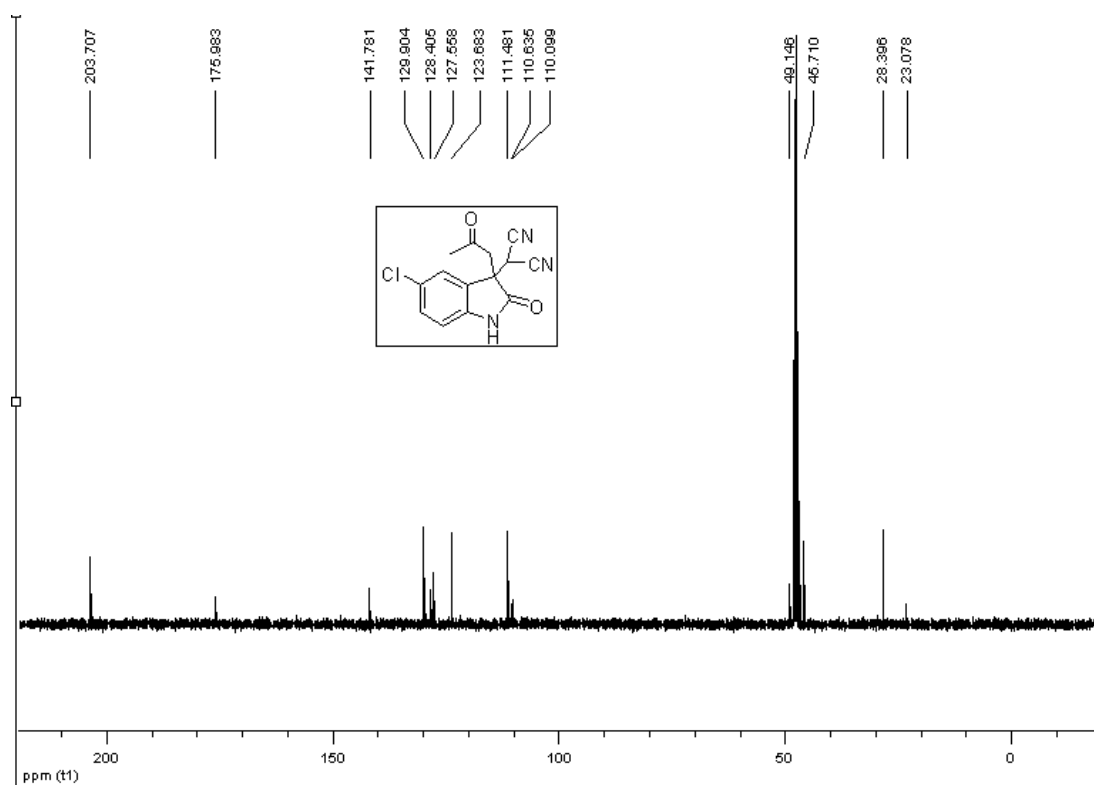

3e

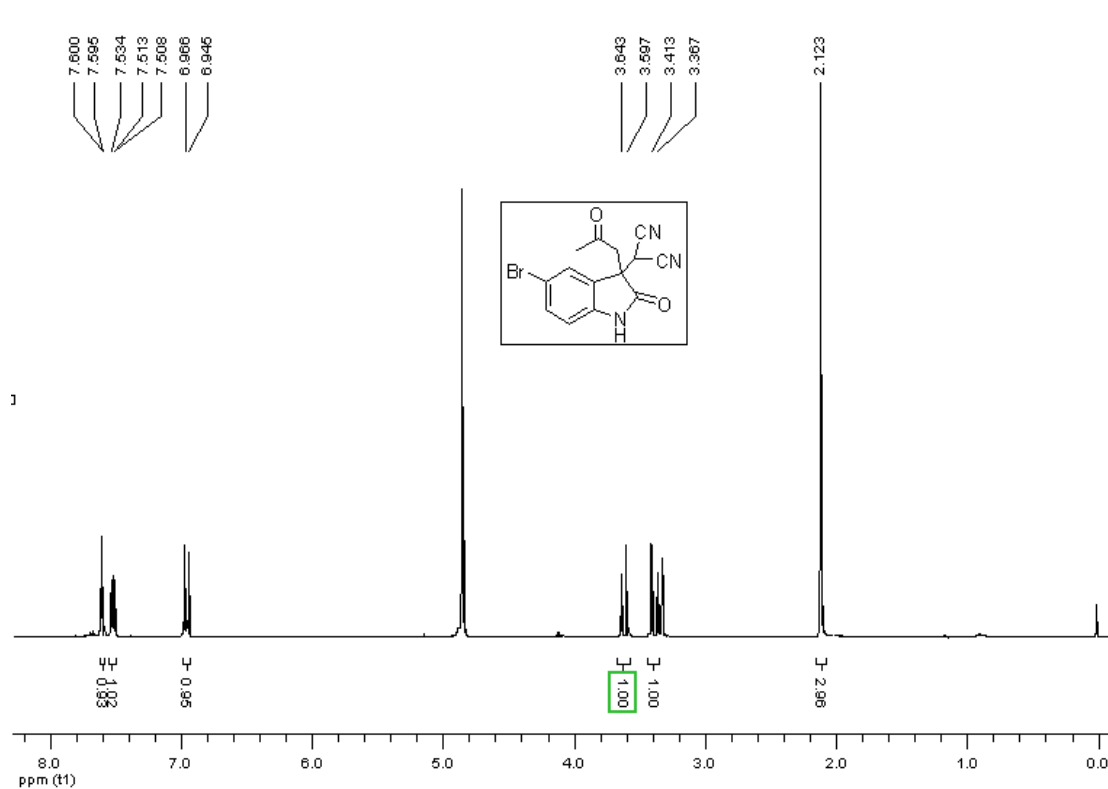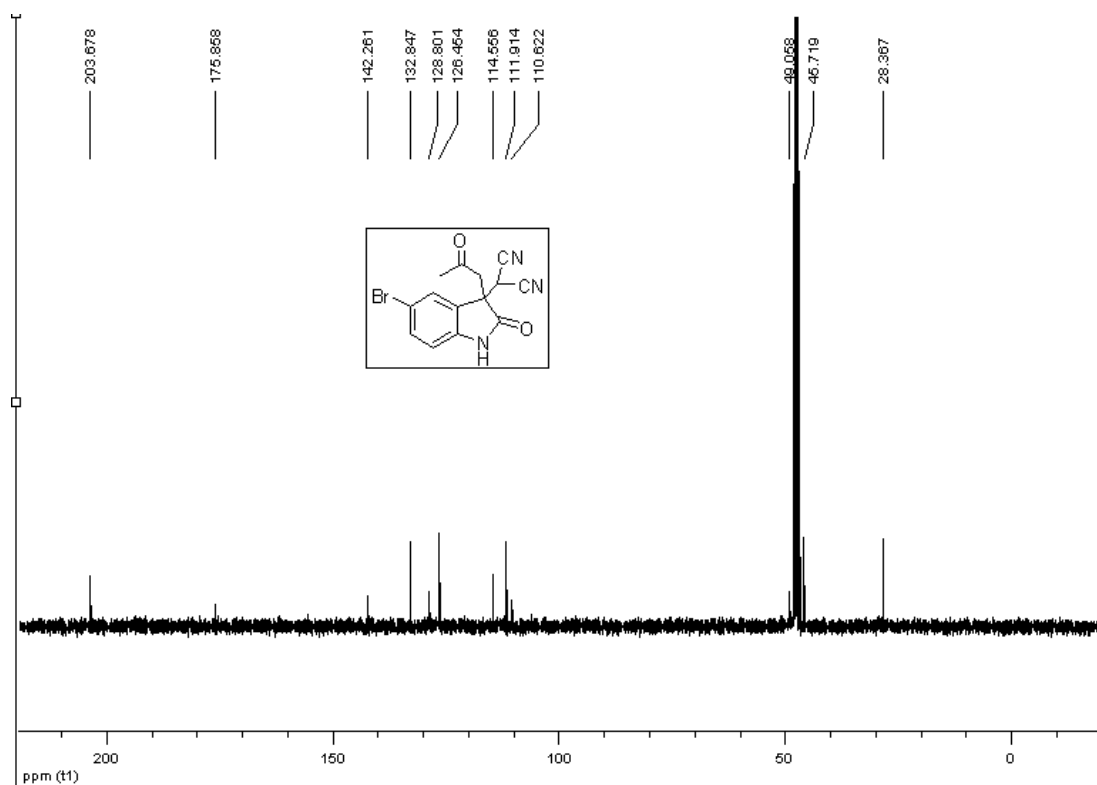

3f

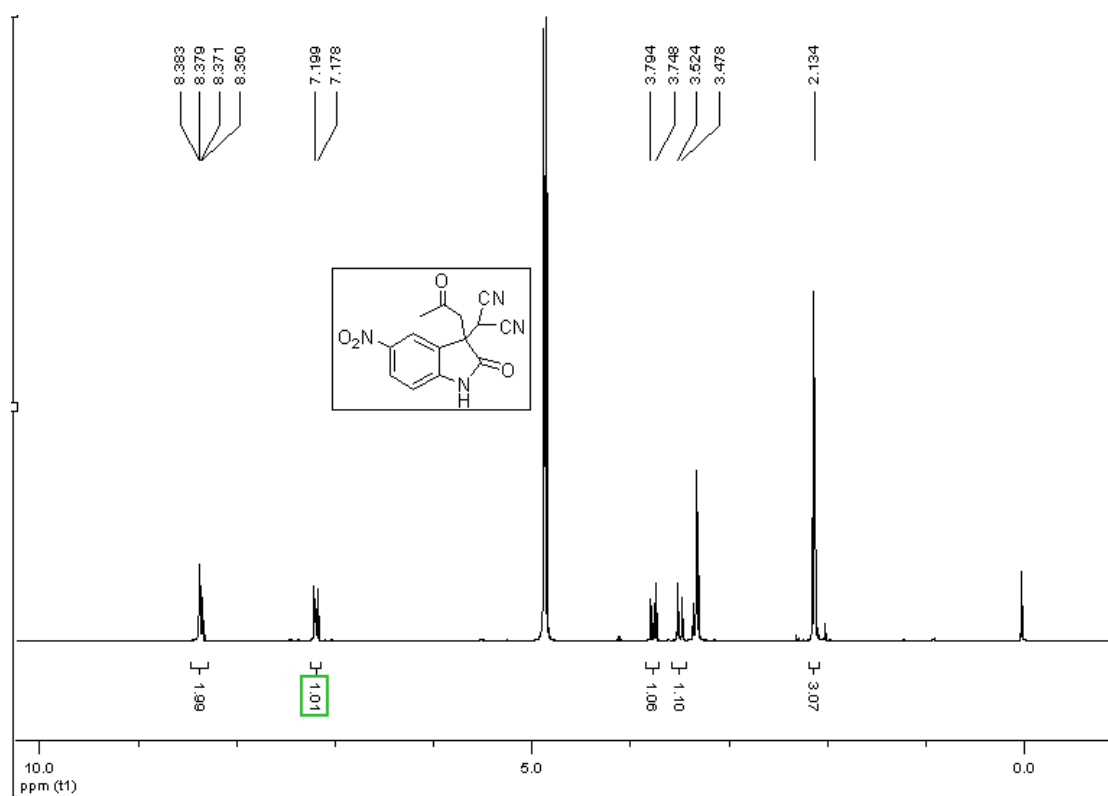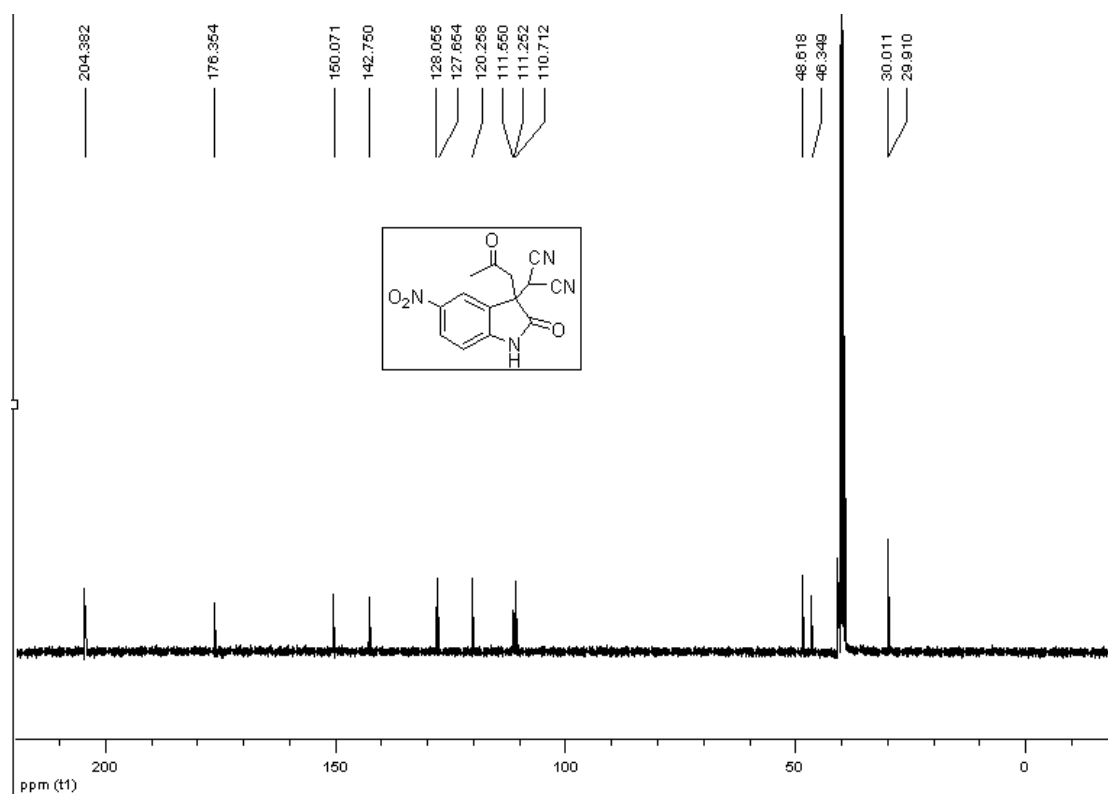

3g

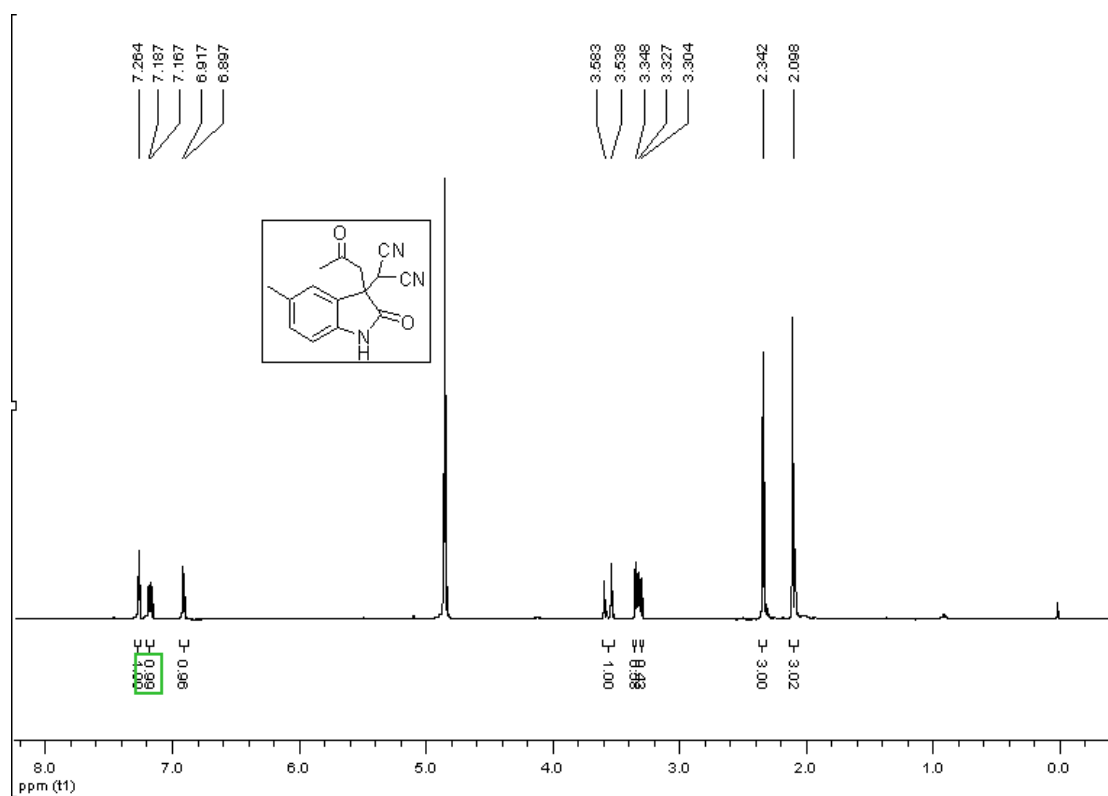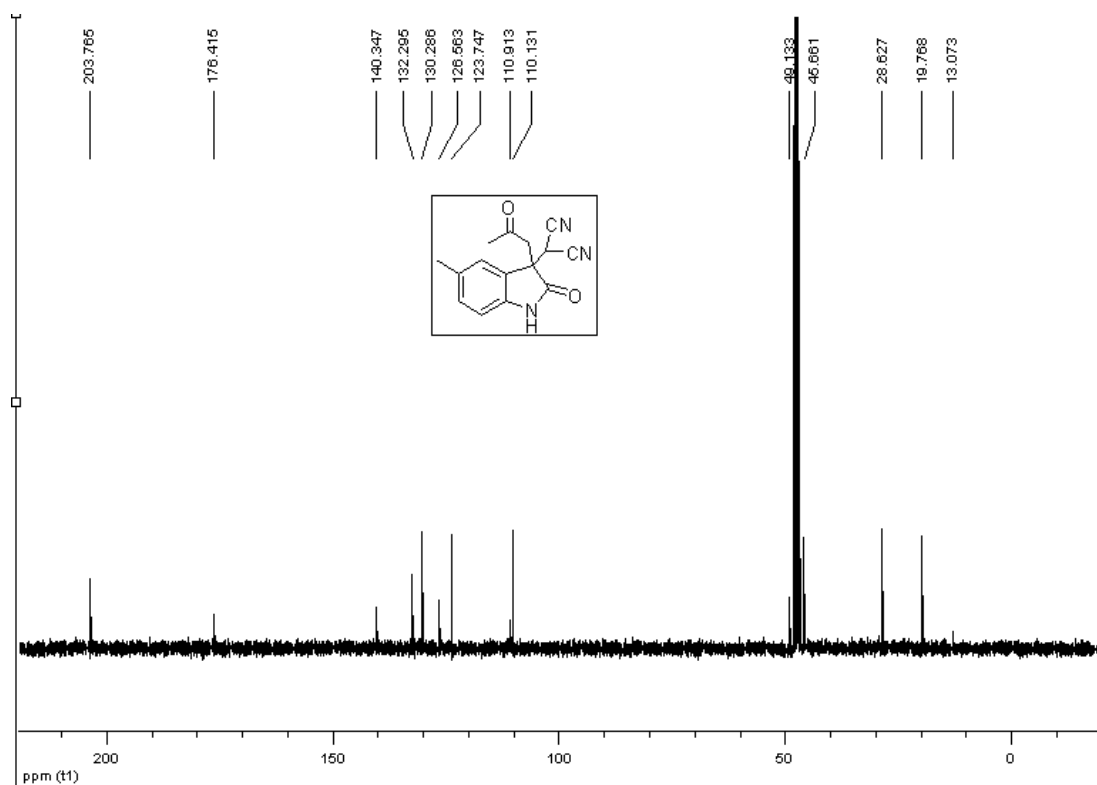

3h

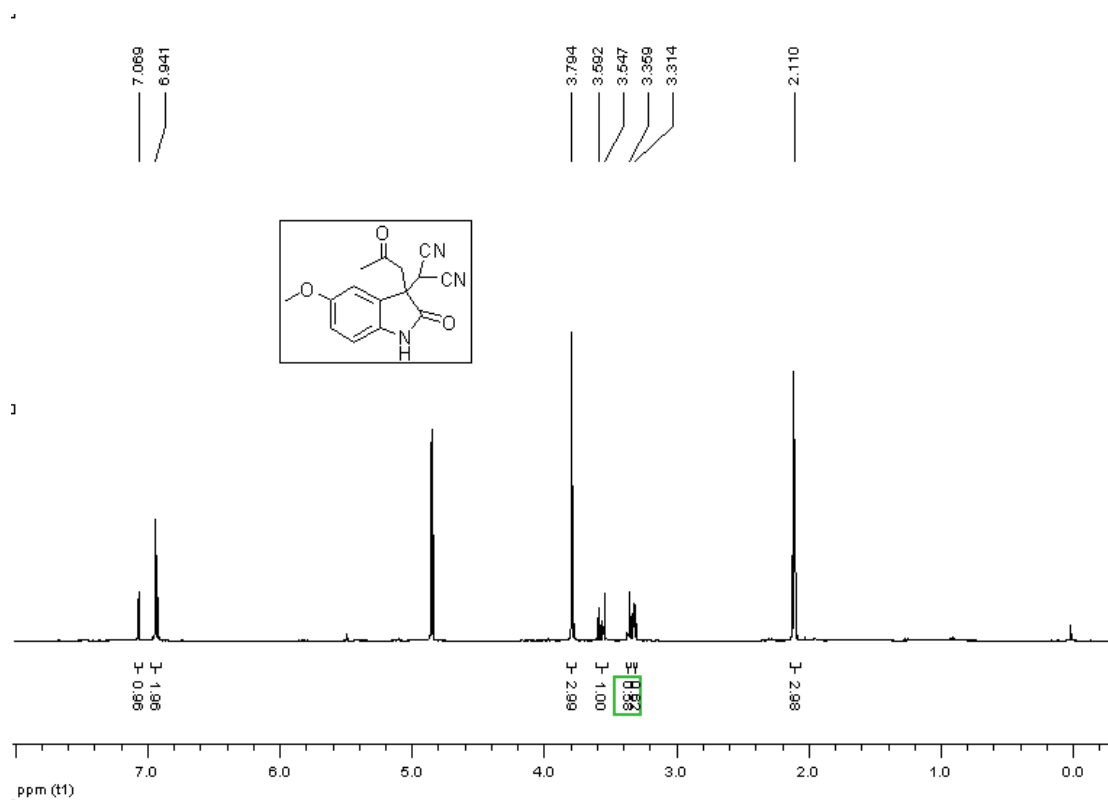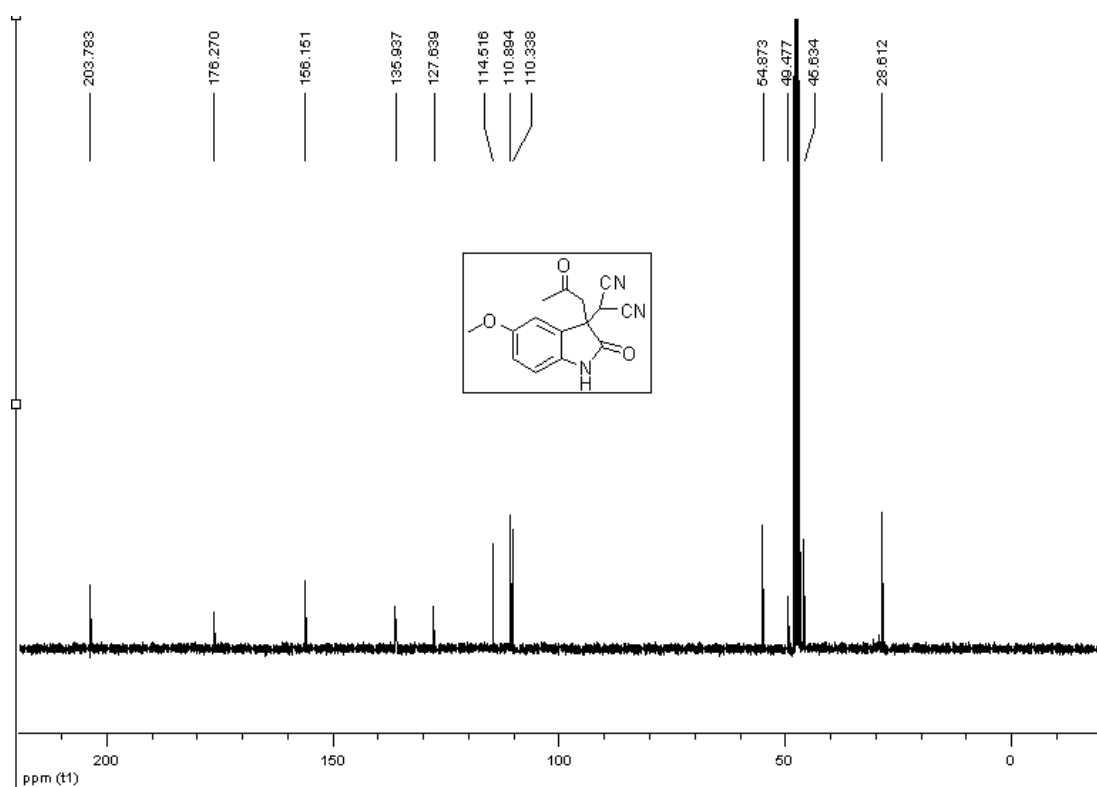



3i

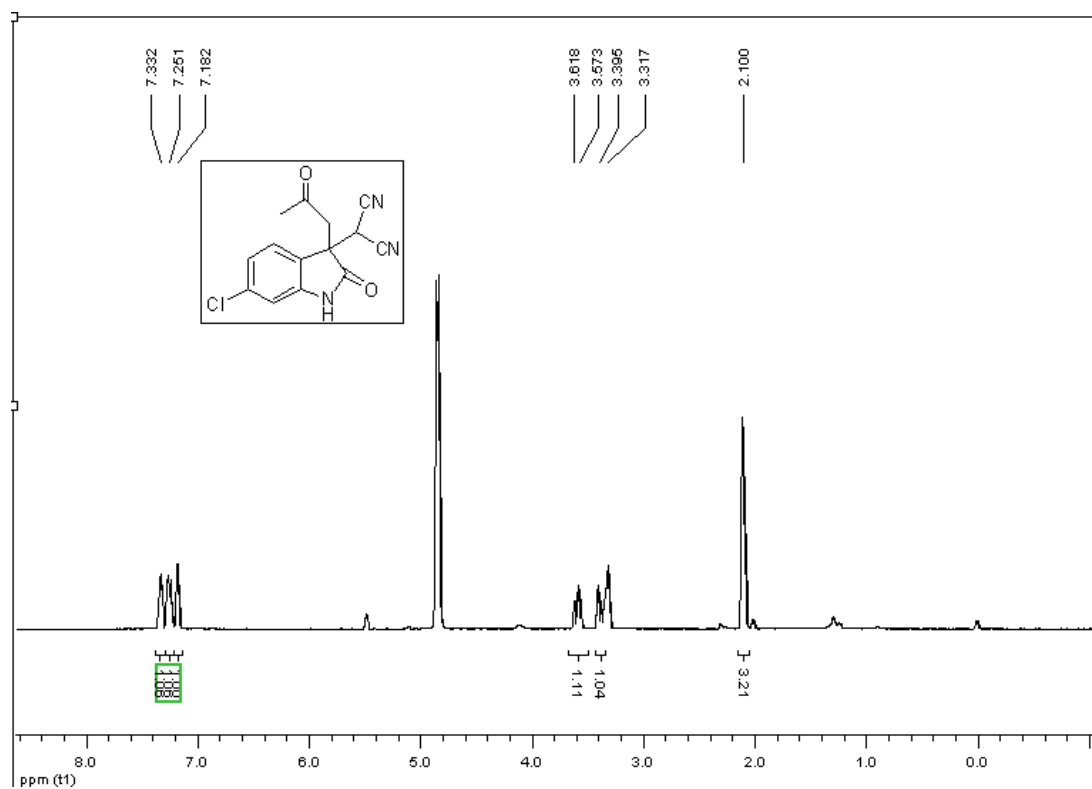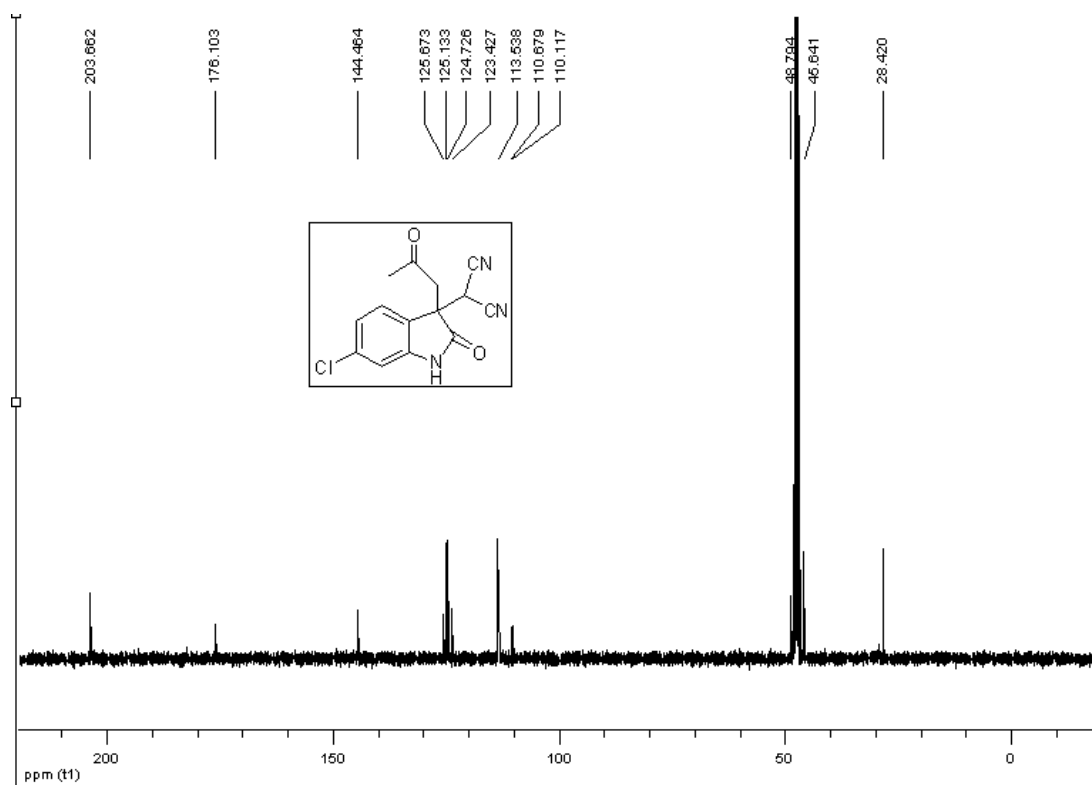

3j

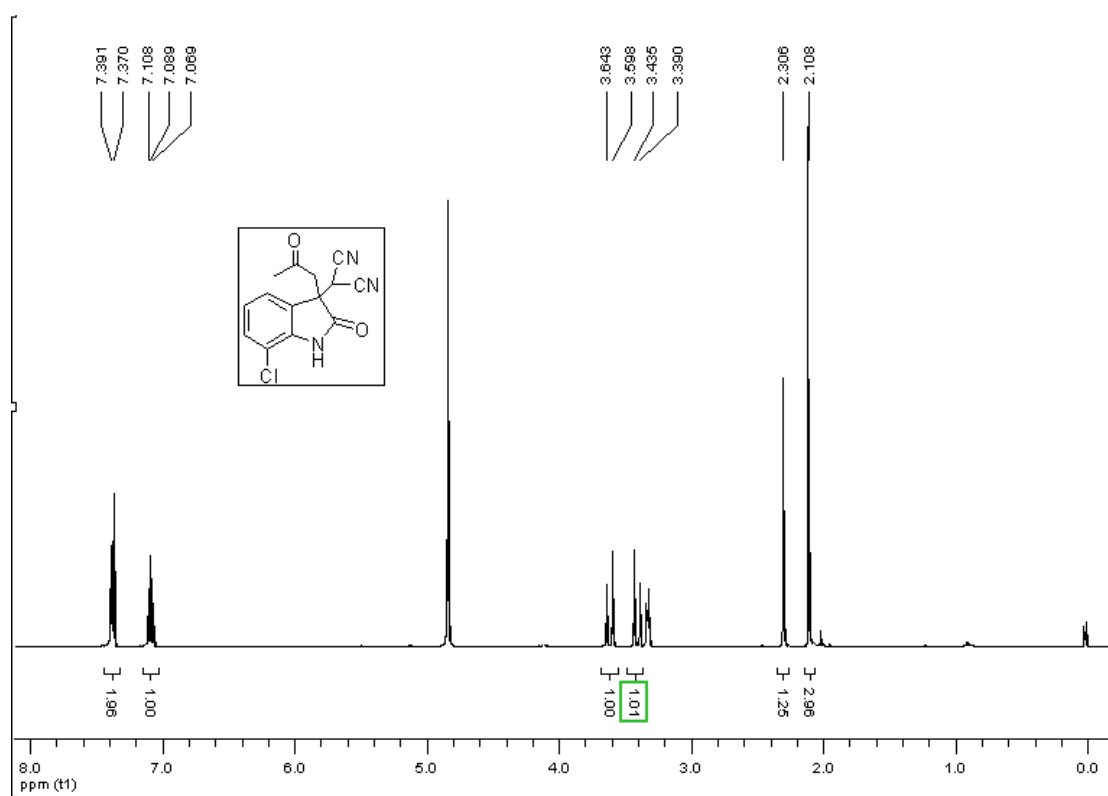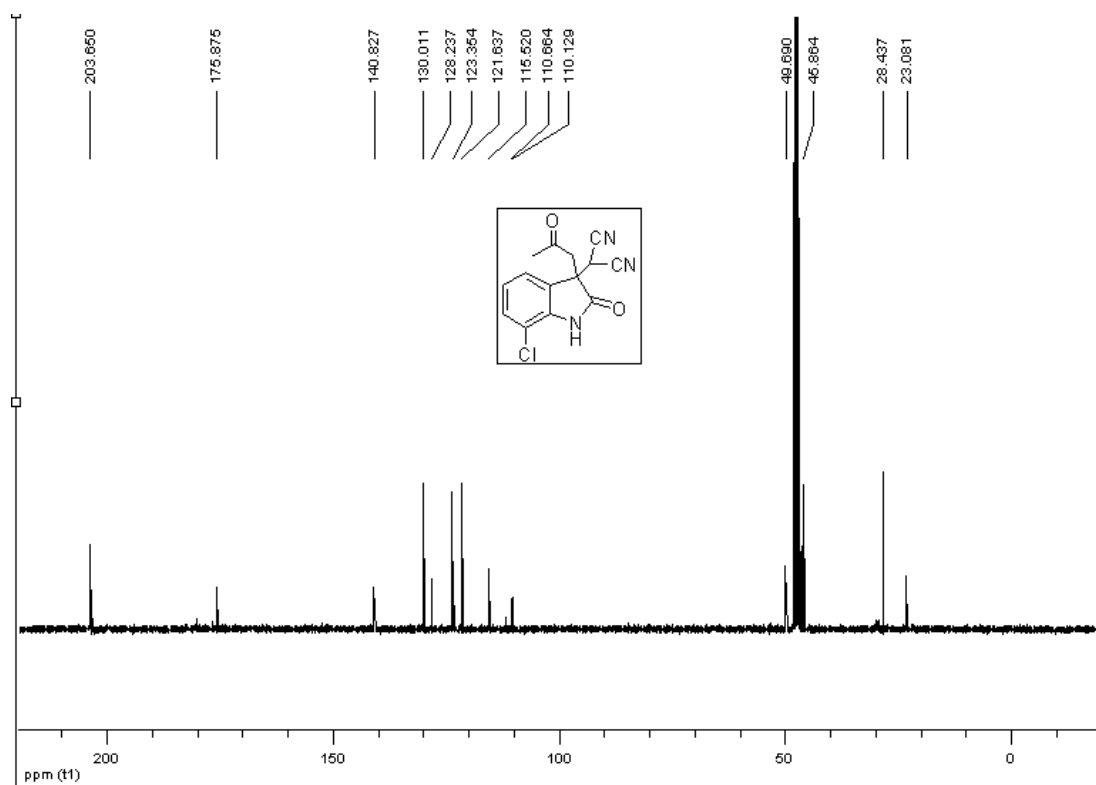

3k

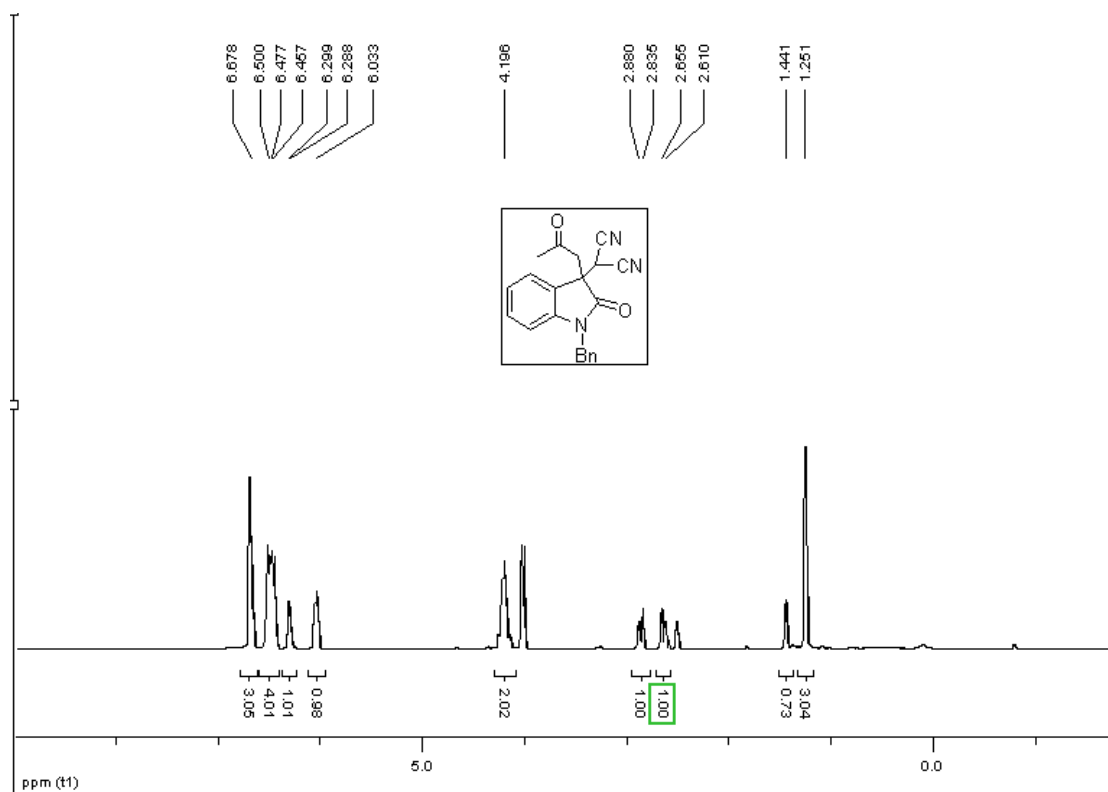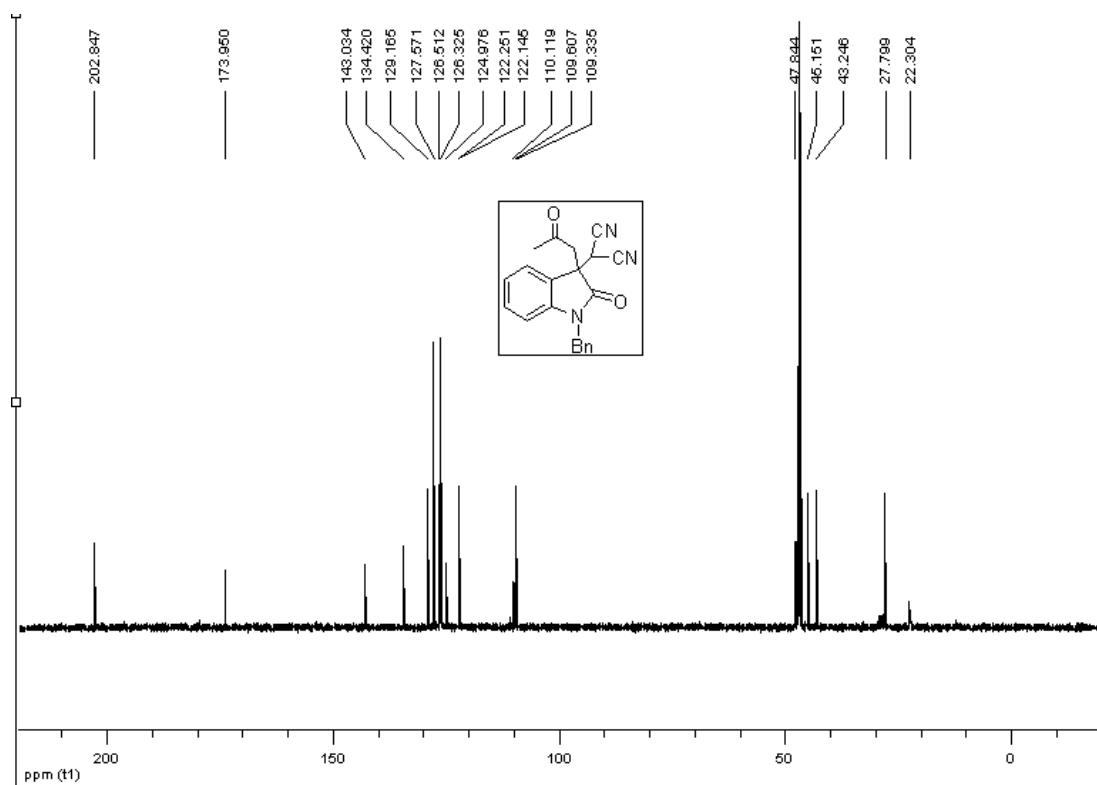

31

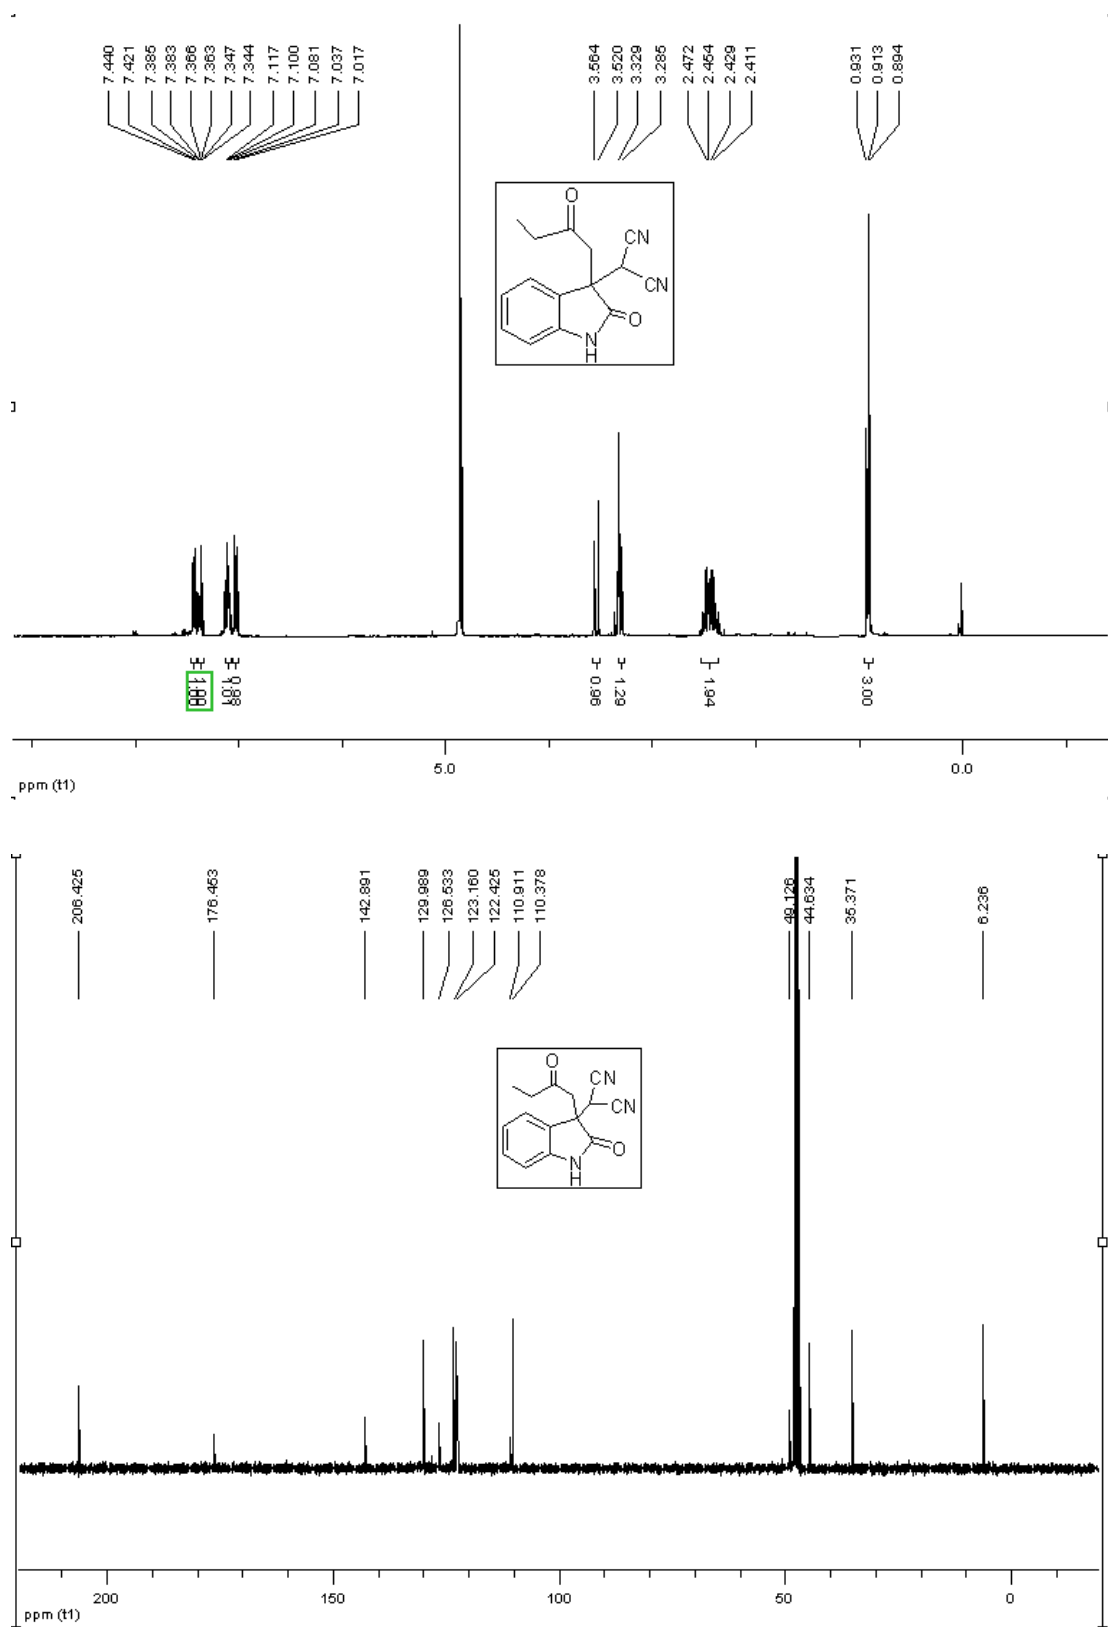

**3m**

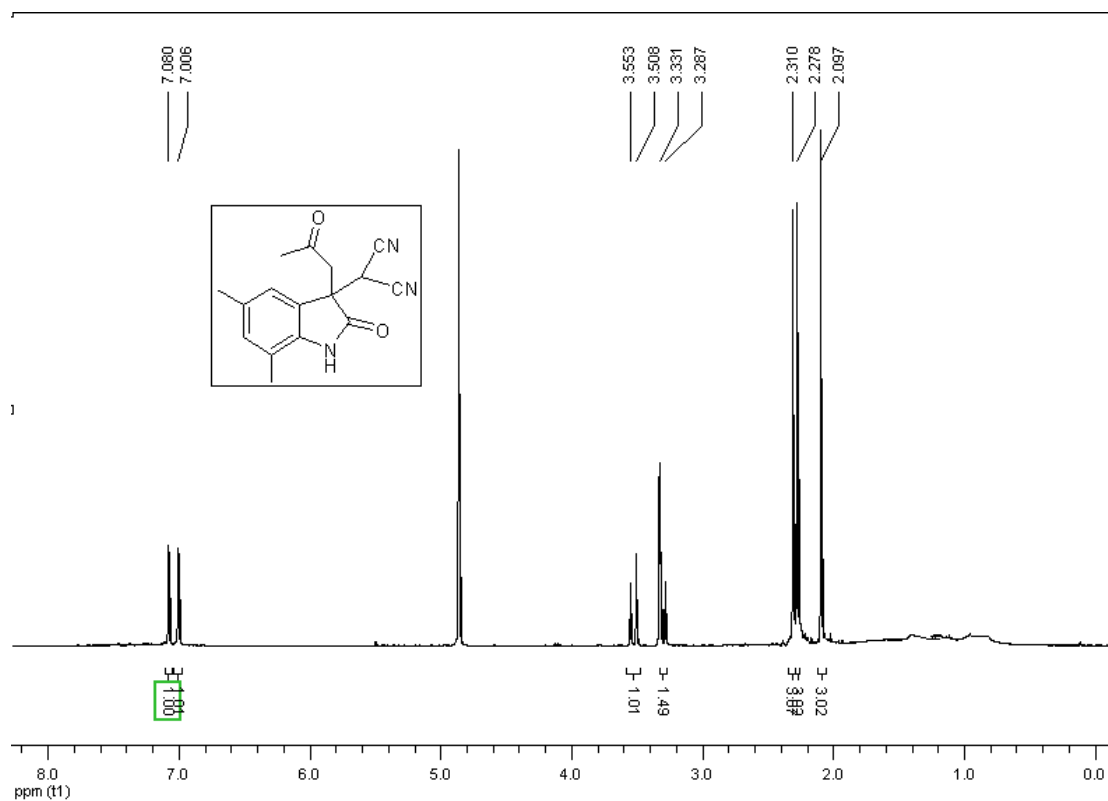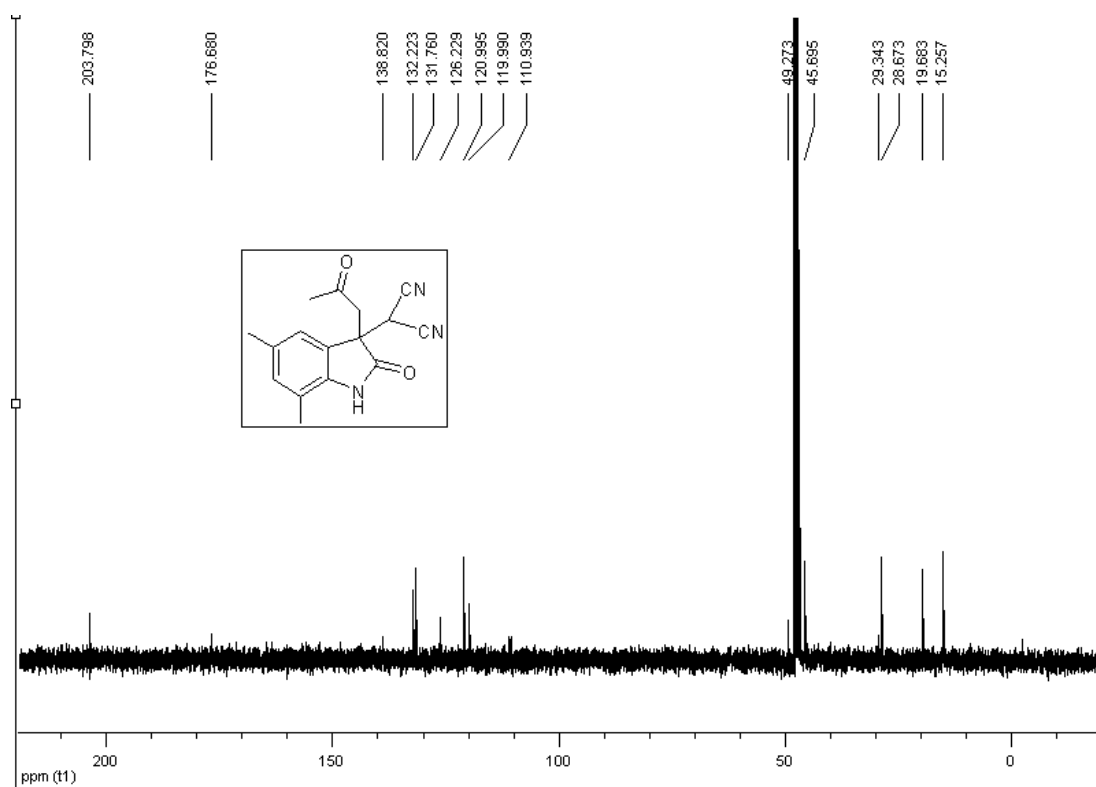

**3n**

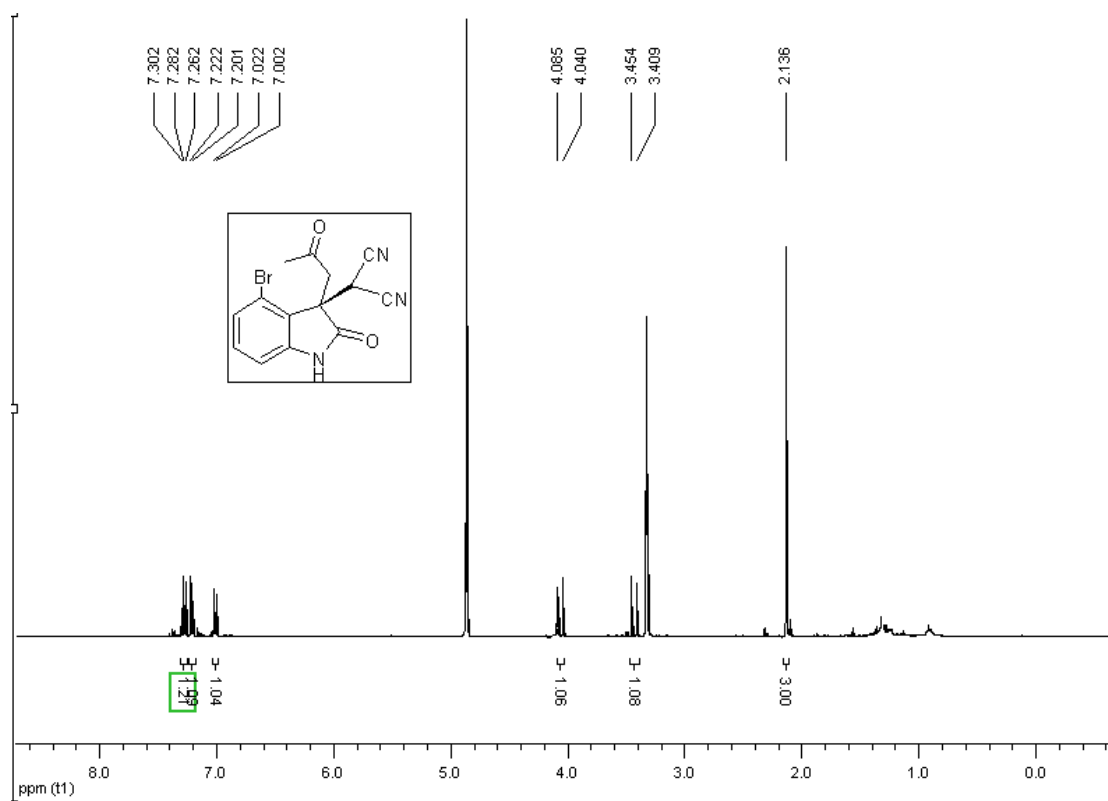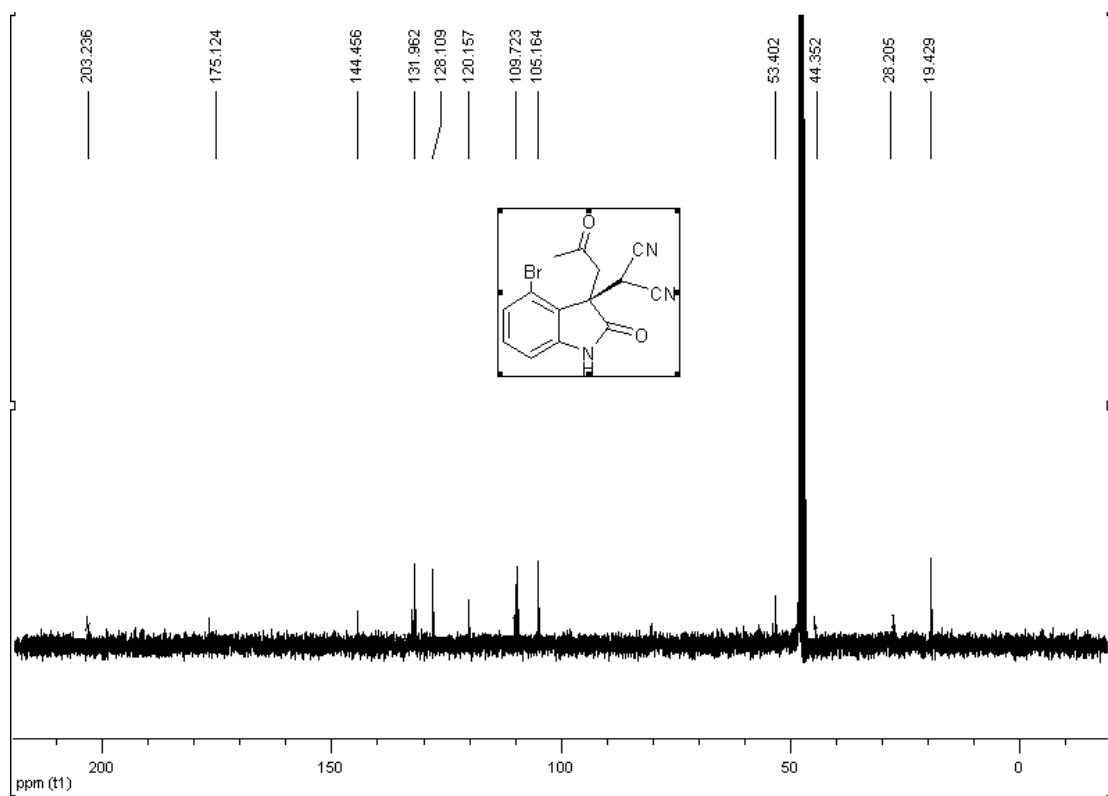

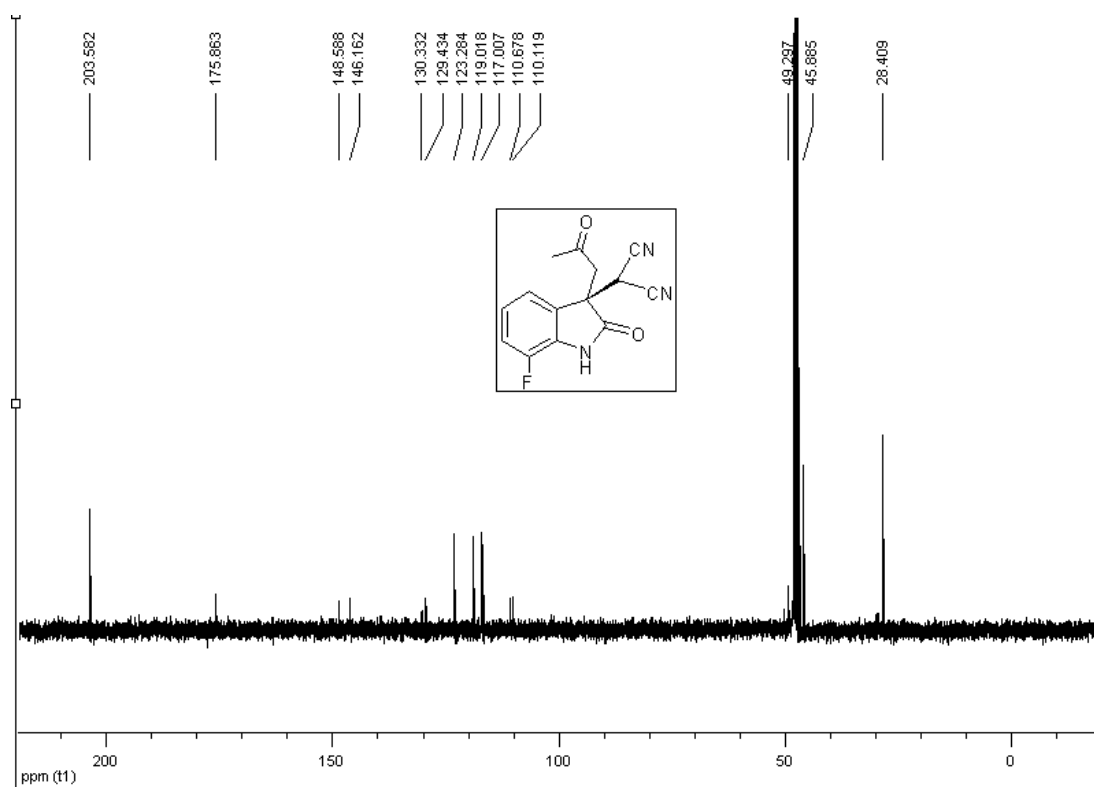

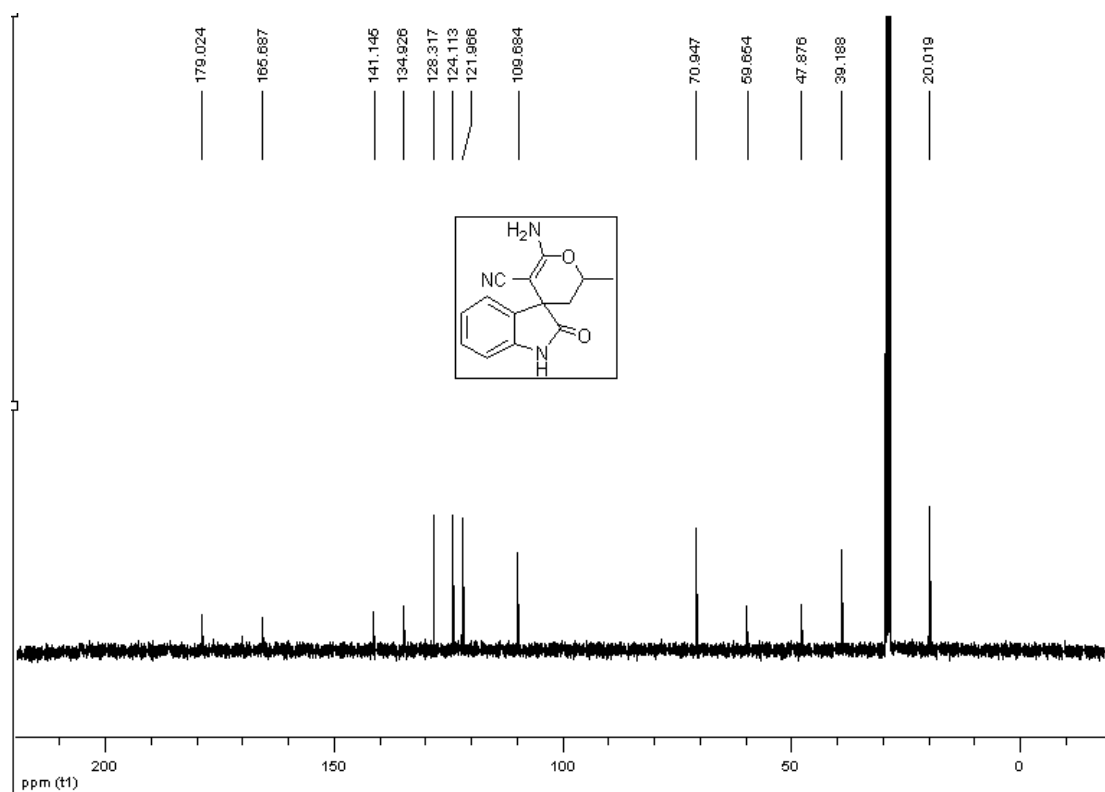



3a

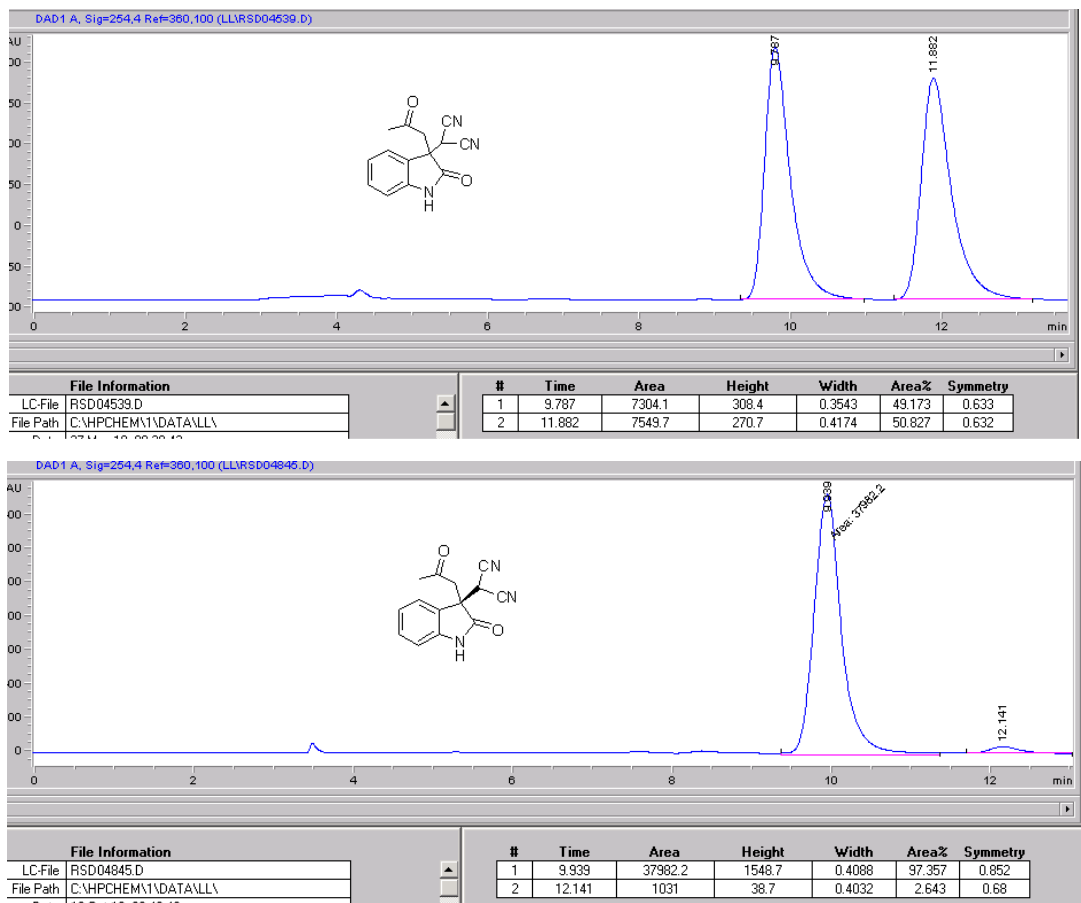

3b

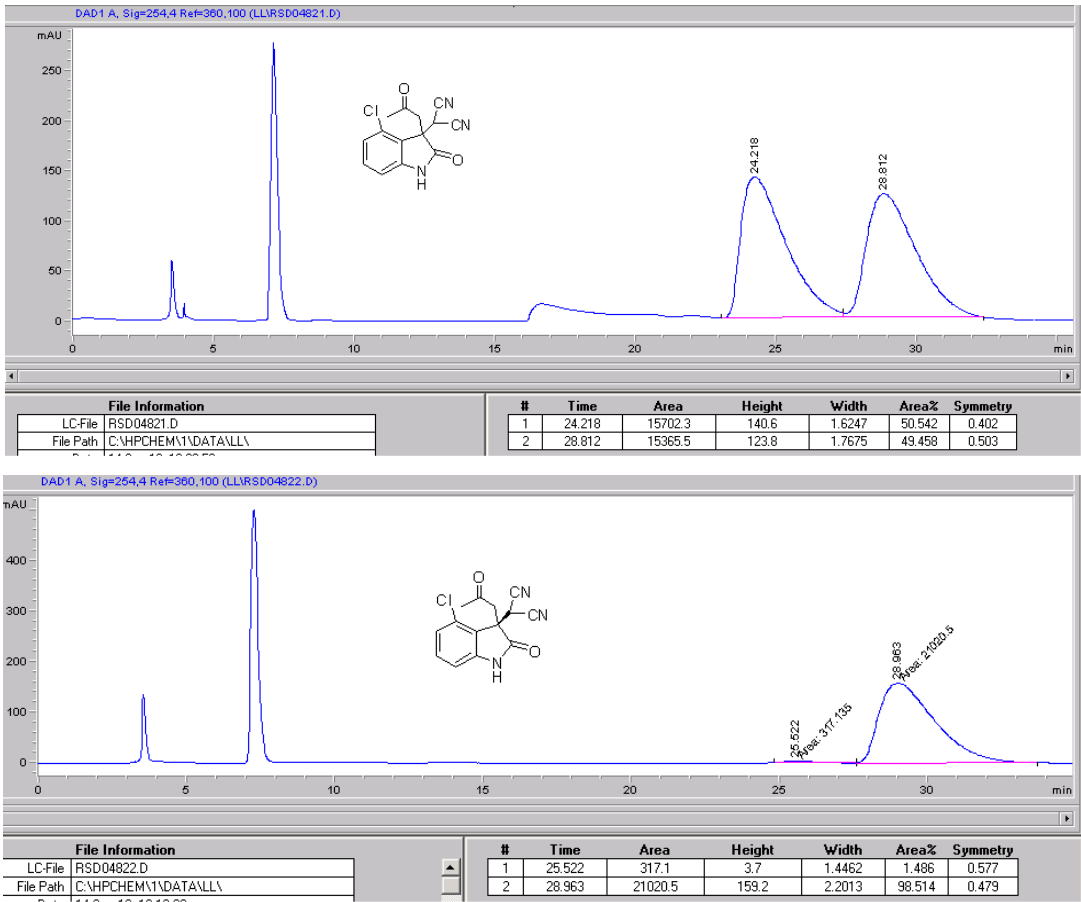

3c

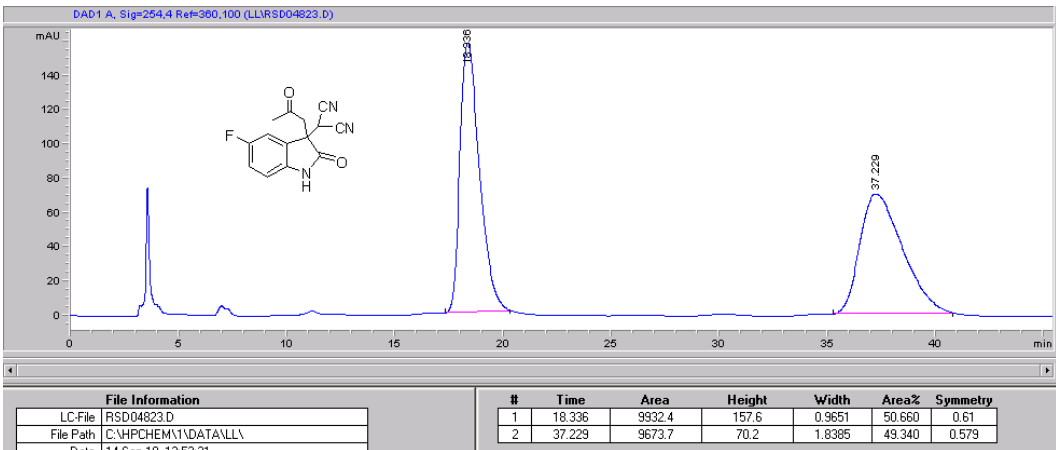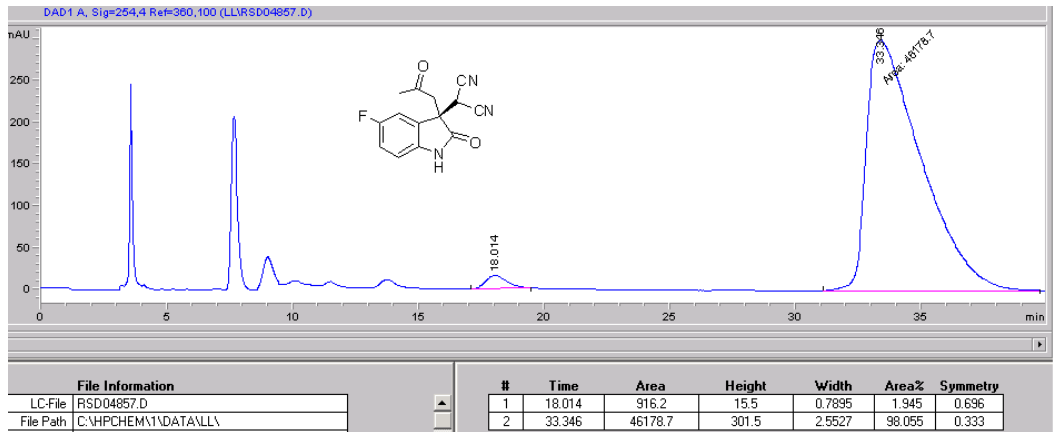

3d

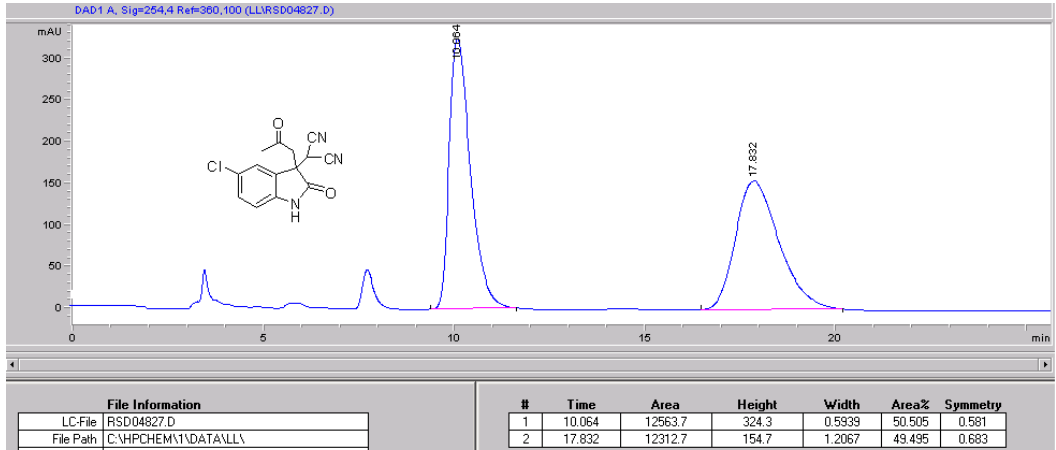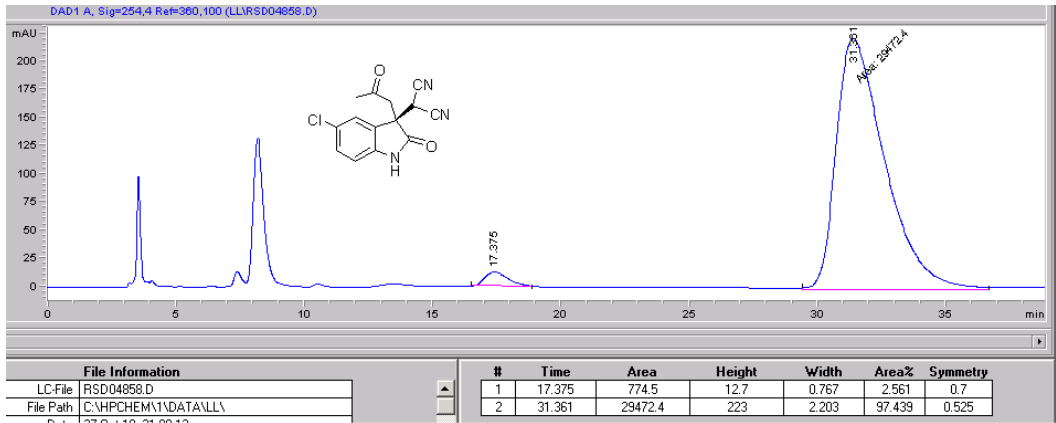

3e

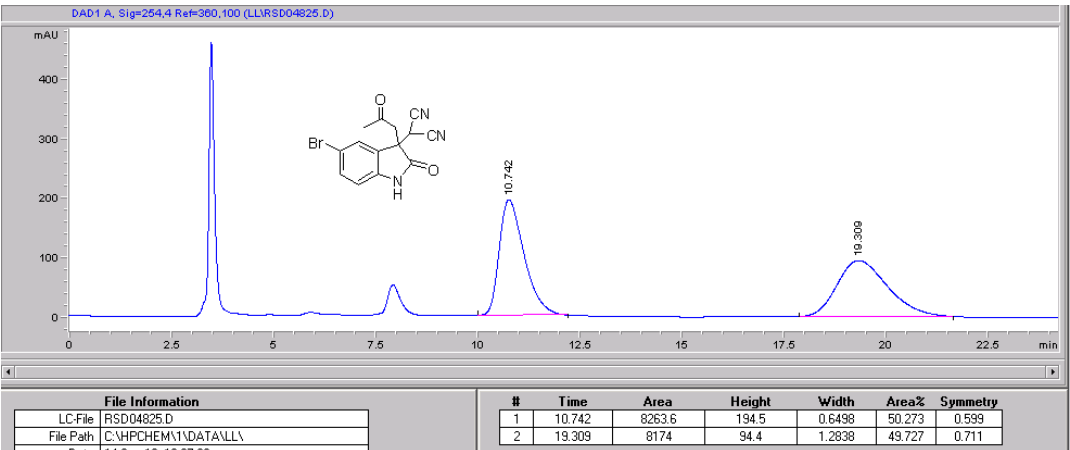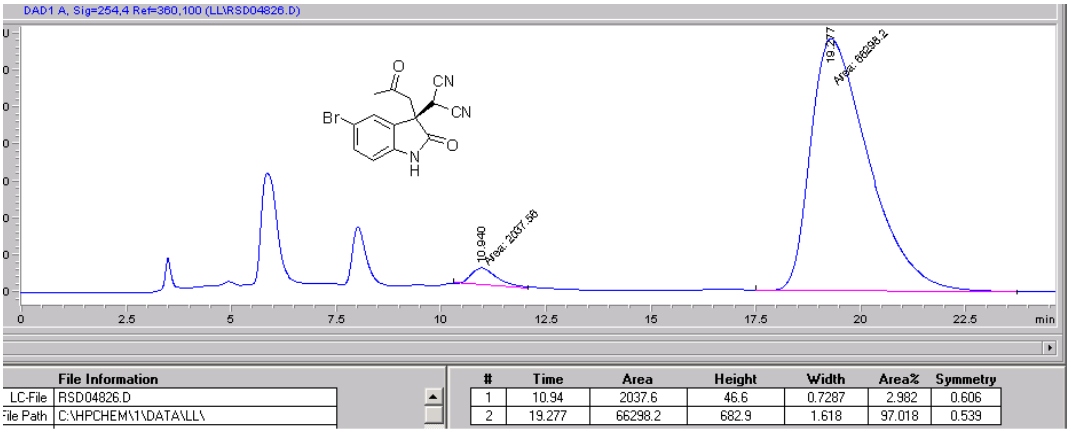

3f

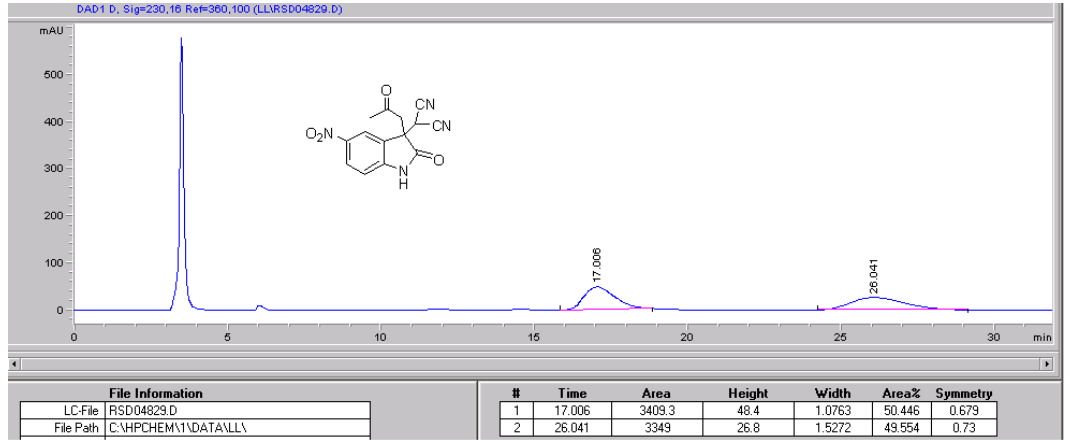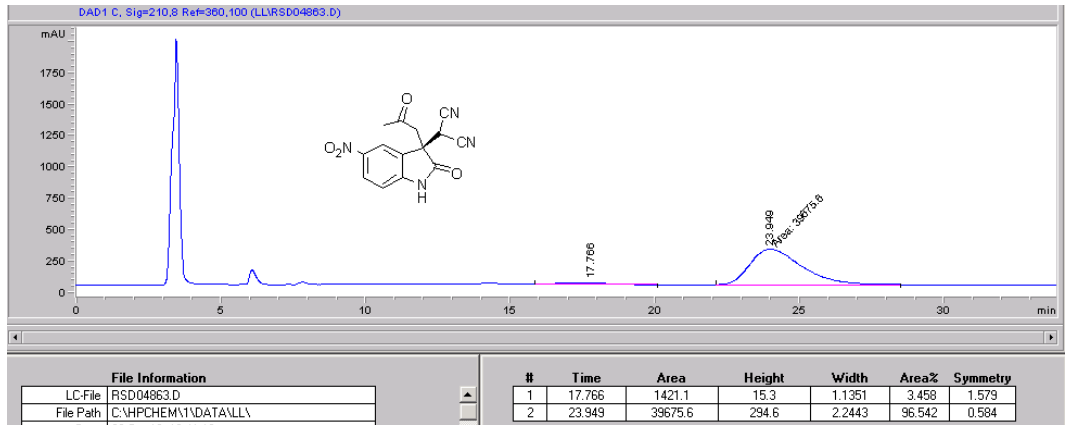

3g

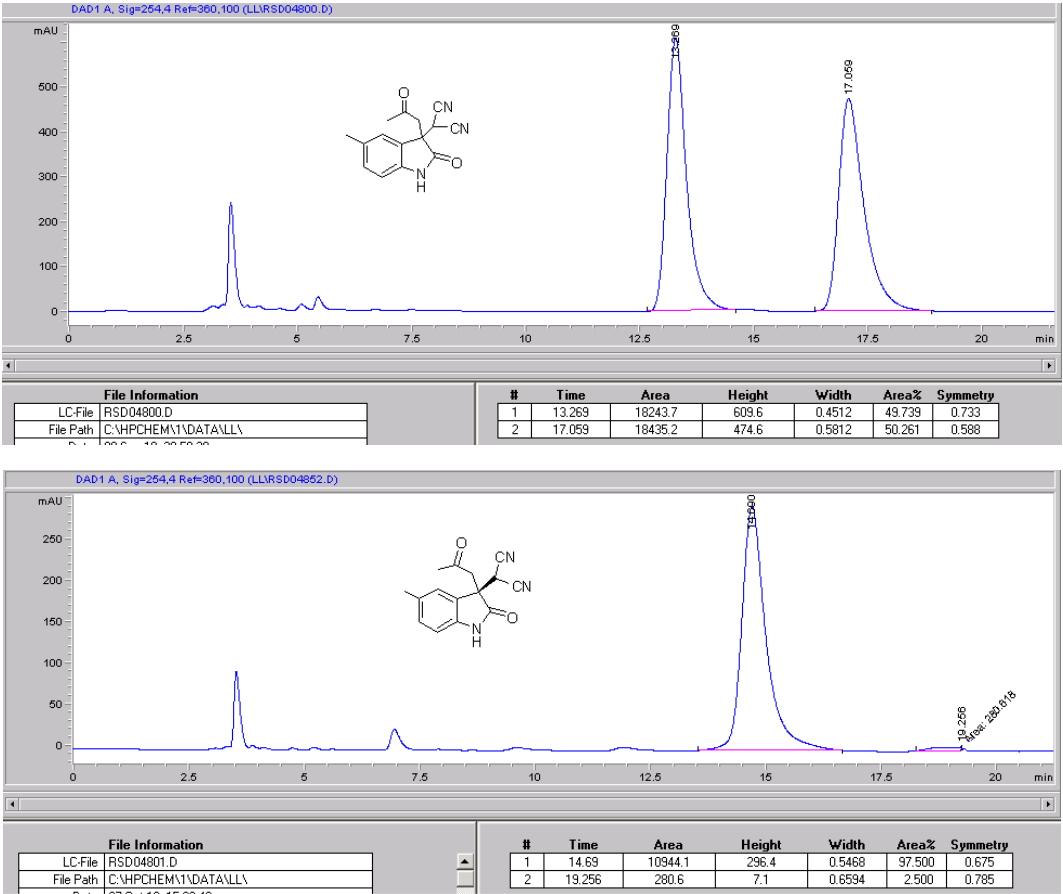

3h

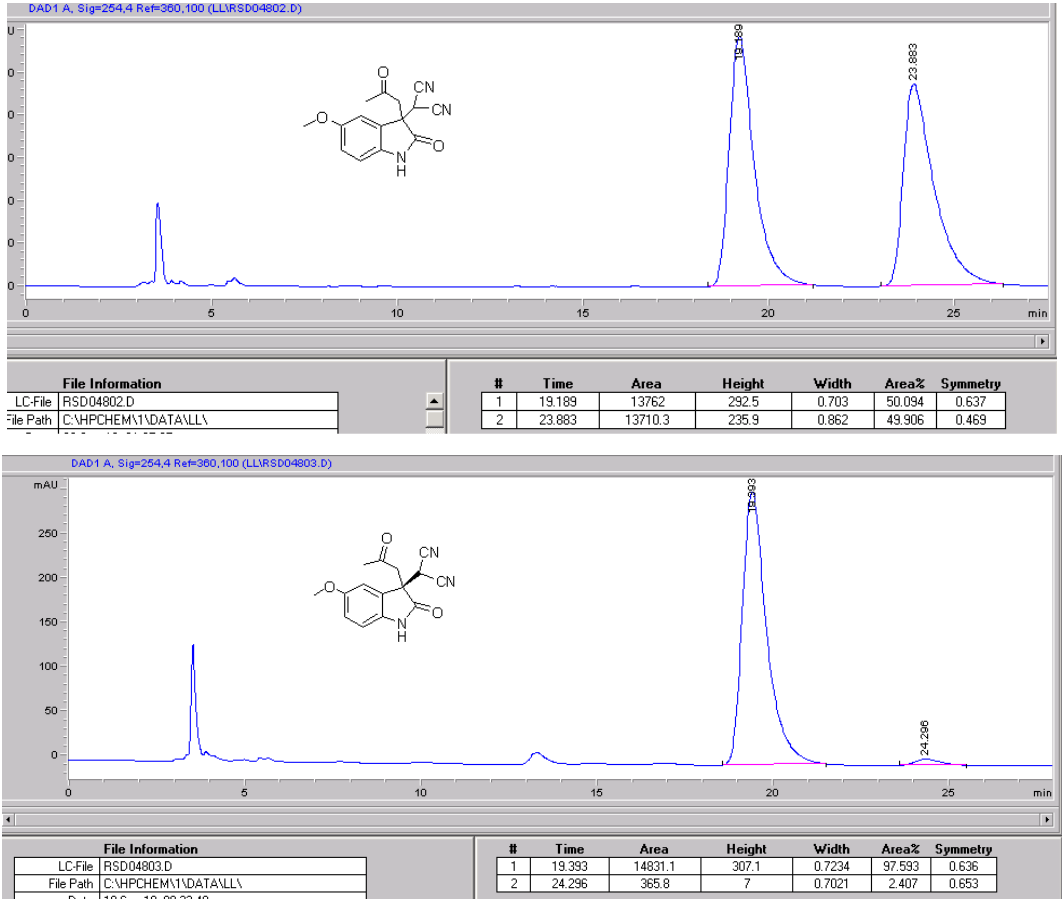

3i

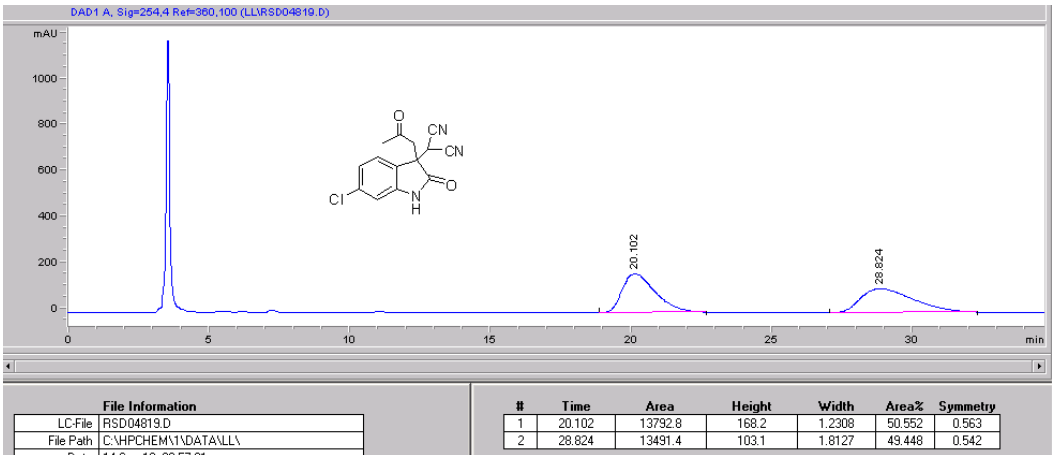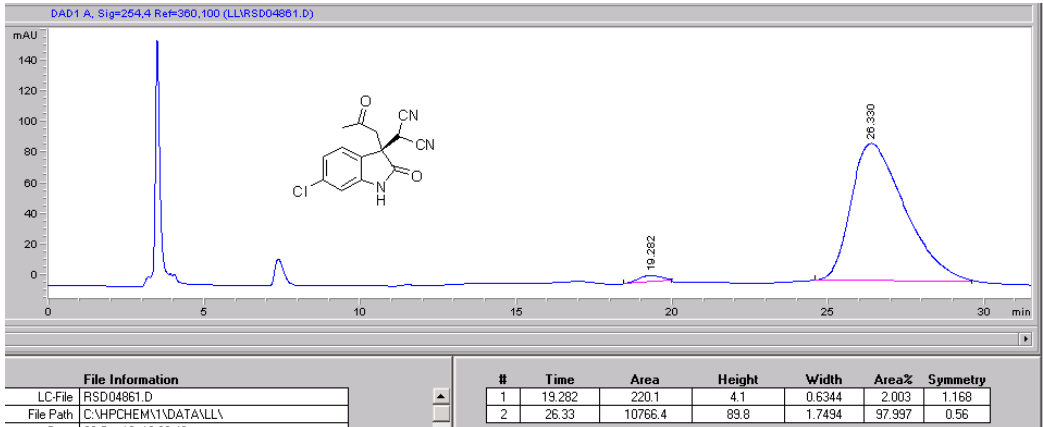

3j

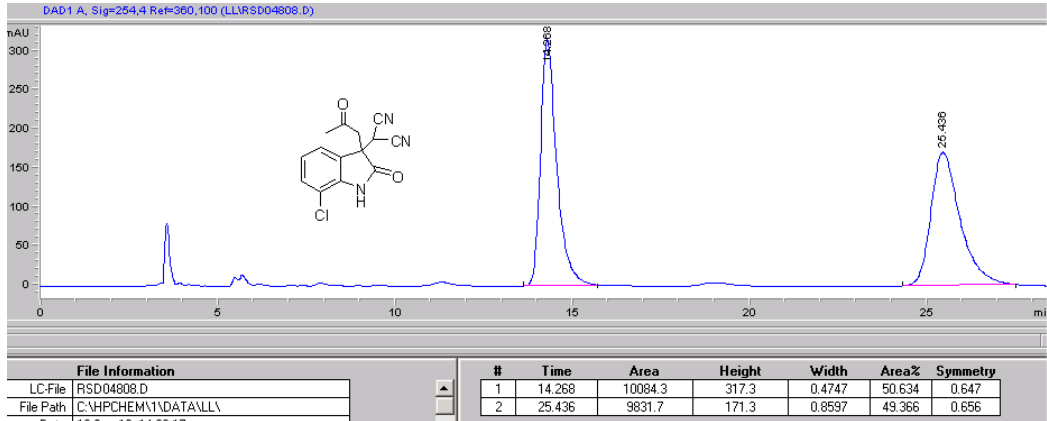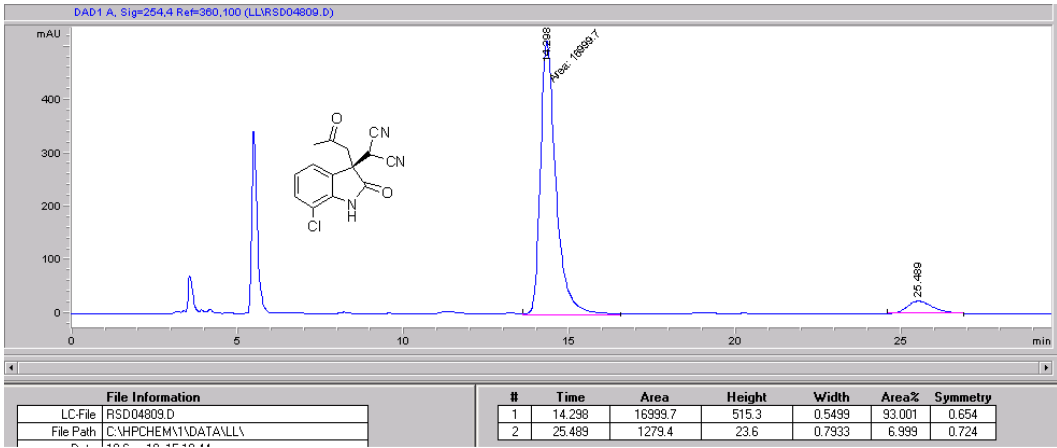

3k

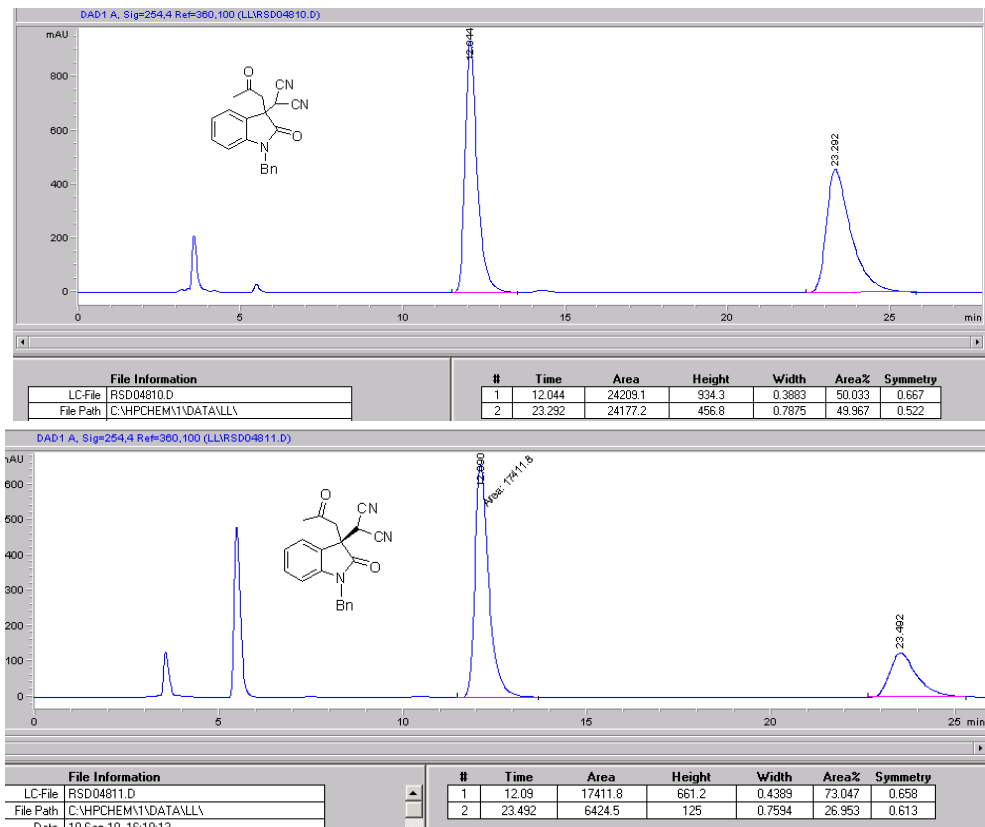

3l

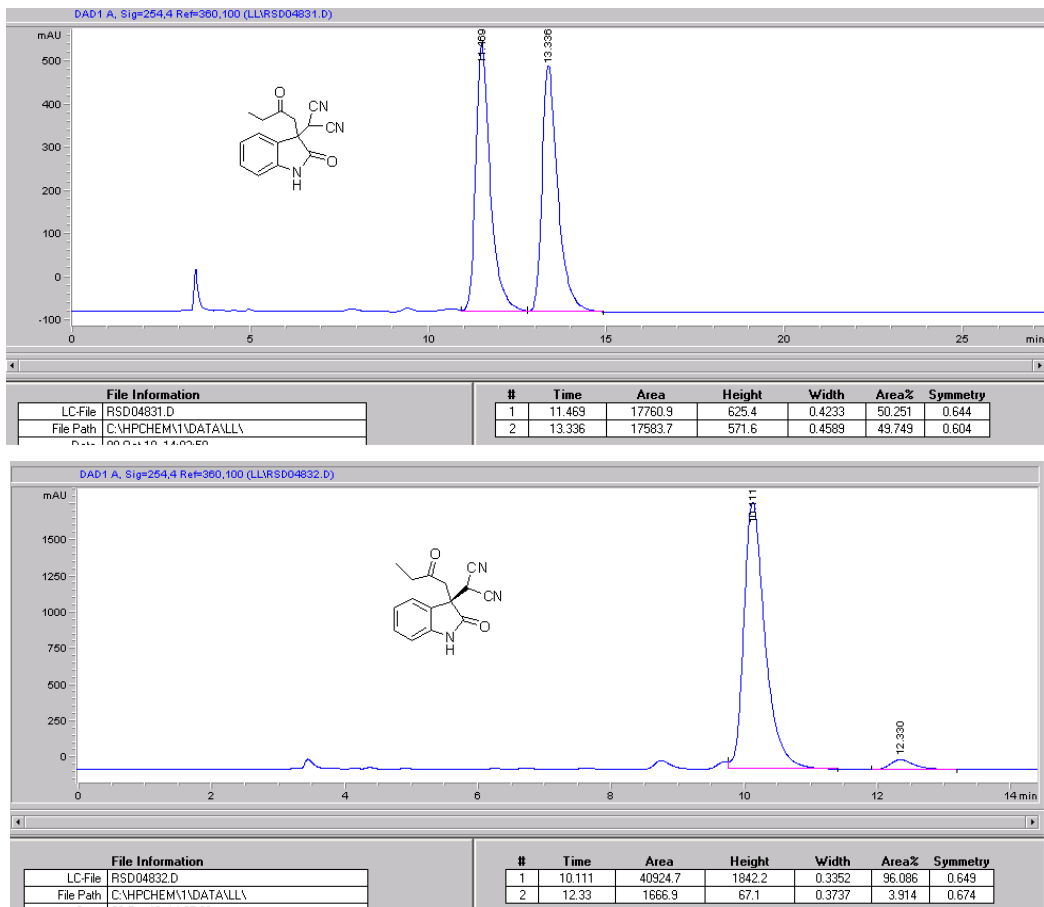

3m

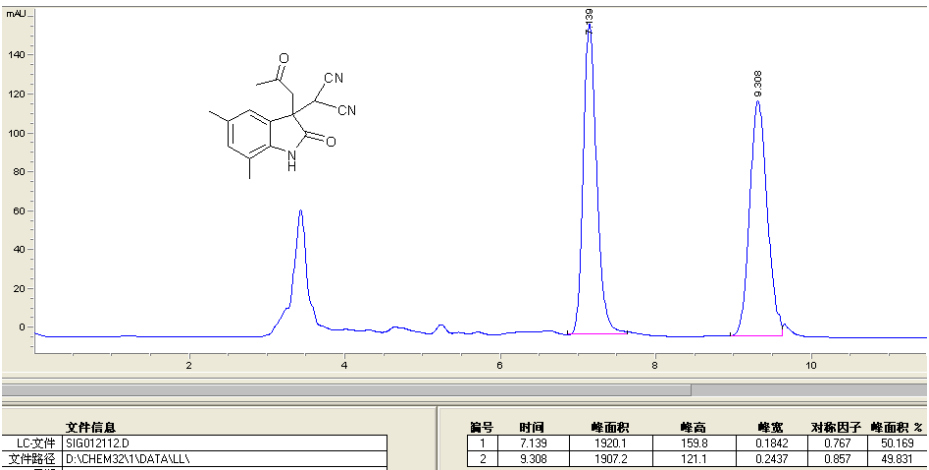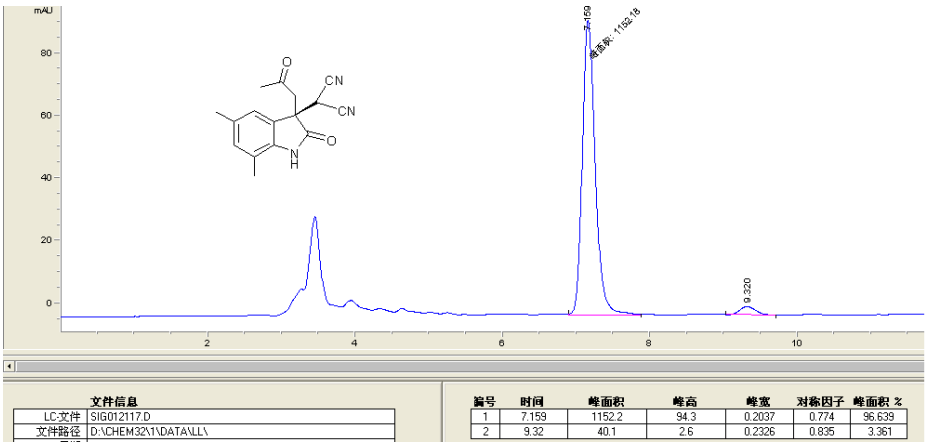

3n

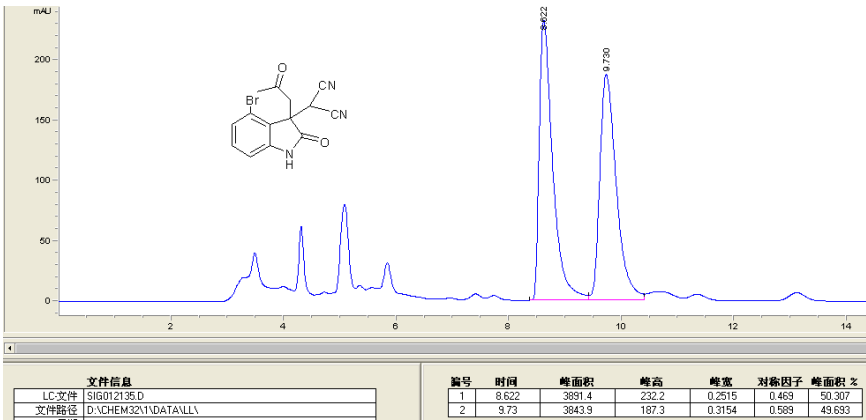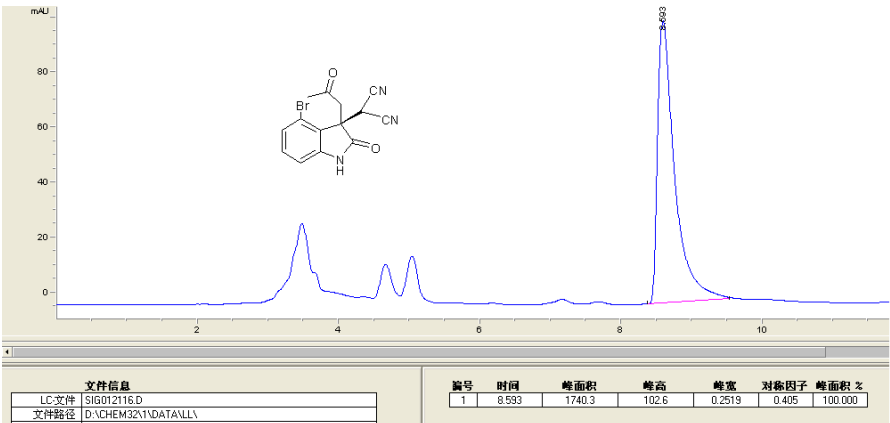

30

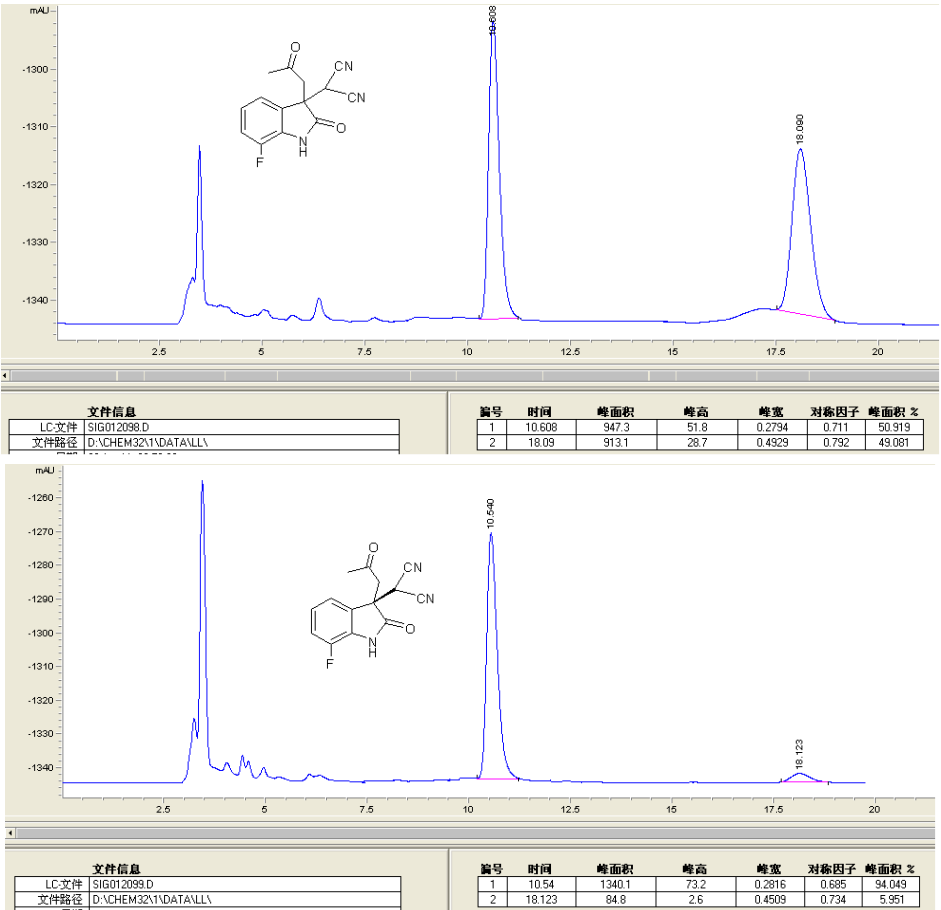

7

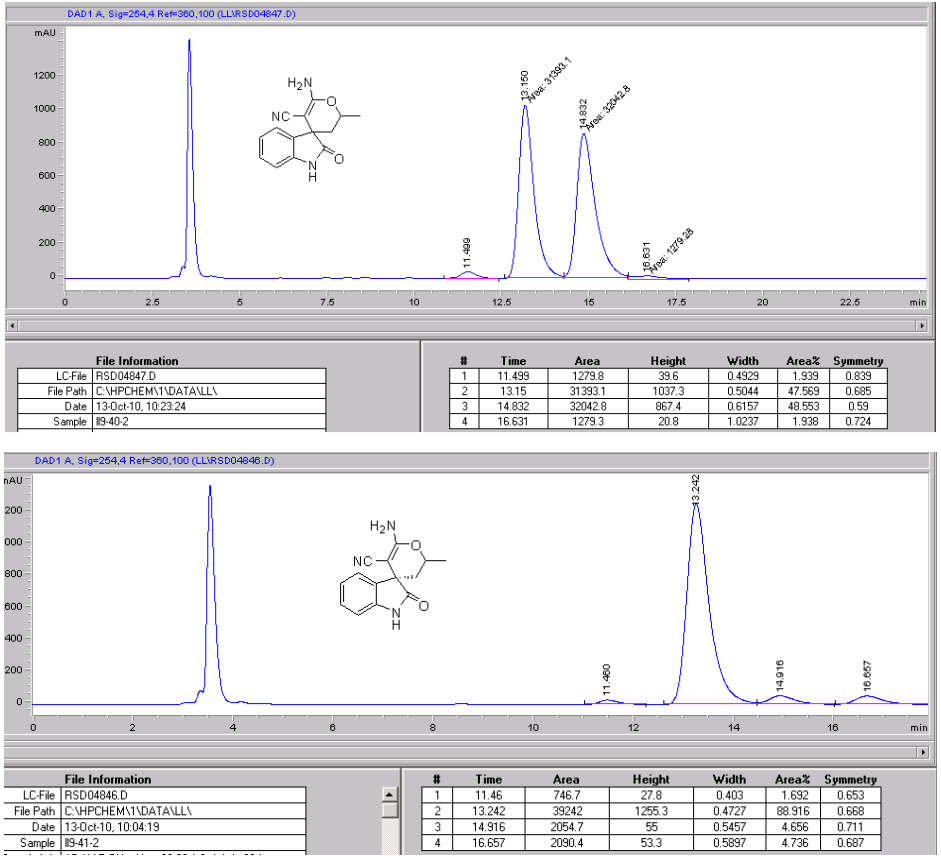

Supplement: c2cc17067a.pdf [file c2cc17067a.pdf]
